# Supplementary material
Source: PubMed Central journal article supplement (PMC6556569)
Supplement: supp_RA118.006814_142105_2_supp_318936_pqrwgb.pdf [file supp_RA118.006814_142105_2_supp_318936_pqrwgb.pdf]

**Bioinformatic and mutational studies of related toxin–antitoxin pairs in *M. tuberculosis* predict and identify key functional residues**

Running title: Toxin-Antitoxin relationships in *M. tuberculosis*

**Himani Tandon<sup>1</sup>, Arun Sharma<sup>2</sup>, Saruchi Wadhwa<sup>2</sup>, Raghavan Varadarajan<sup>1</sup>, Ramandeep Singh<sup>2</sup>, Narayanaswamy Srinivasan<sup>1\*</sup> and Sankaran Sandhya<sup>1\*</sup>**

<sup>1</sup>Molecular Biophysics Unit, Indian Institute of Science, Bengaluru, 560012, India.

<sup>2</sup>Tuberculosis Research Laboratory, Vaccine and Infectious Disease Research Centre, Translational Health Science and Technology Institute, NCR Biotech Science Cluster, 3rd Milestone, PO Box # 4, Faridabad, Haryana- 121001, India.

\* To whom correspondence should be addressed: Sankaran Sandhya:

Molecular Biophysics Unit, Indian Institute of Science, Bangalore- 560012; [sandhyas@iisc.ac.in](mailto:sandhyas@iisc.ac.in); Tel: +918022932837; Fax: +918023600535.

Correspondence may also be addressed to Narayanaswamy Srinivasan.

Molecular Biophysics Unit, Indian Institute of Science, Bangalore- 560012; [ns@iisc.ac.in](mailto:ns@iisc.ac.in); Tel: +918022932837; Fax: +918023600535.

**Keywords:** Toxin-antitoxin, homology, paralogues, structure-function, *Mycobacterium tuberculosis*, genome analysis, bacteriostasis, VapBC, PIN domain, phylogeny, molecular modelling, protein evolution

**Contents**

**Figure S1-S15**

**A**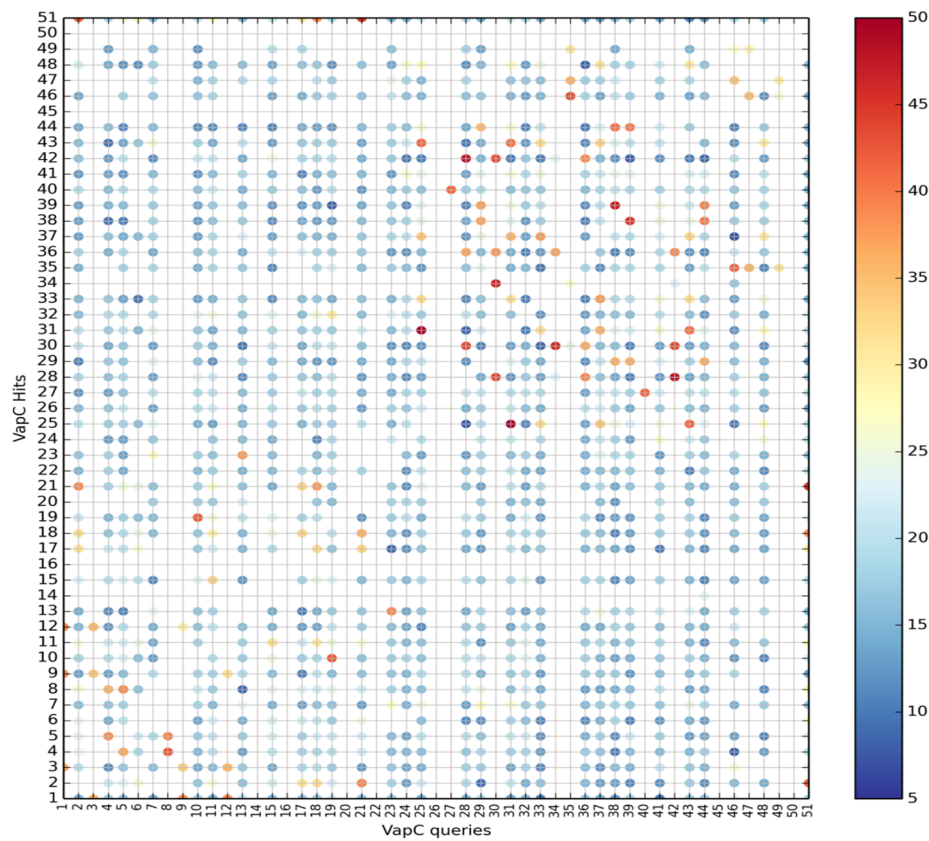**B**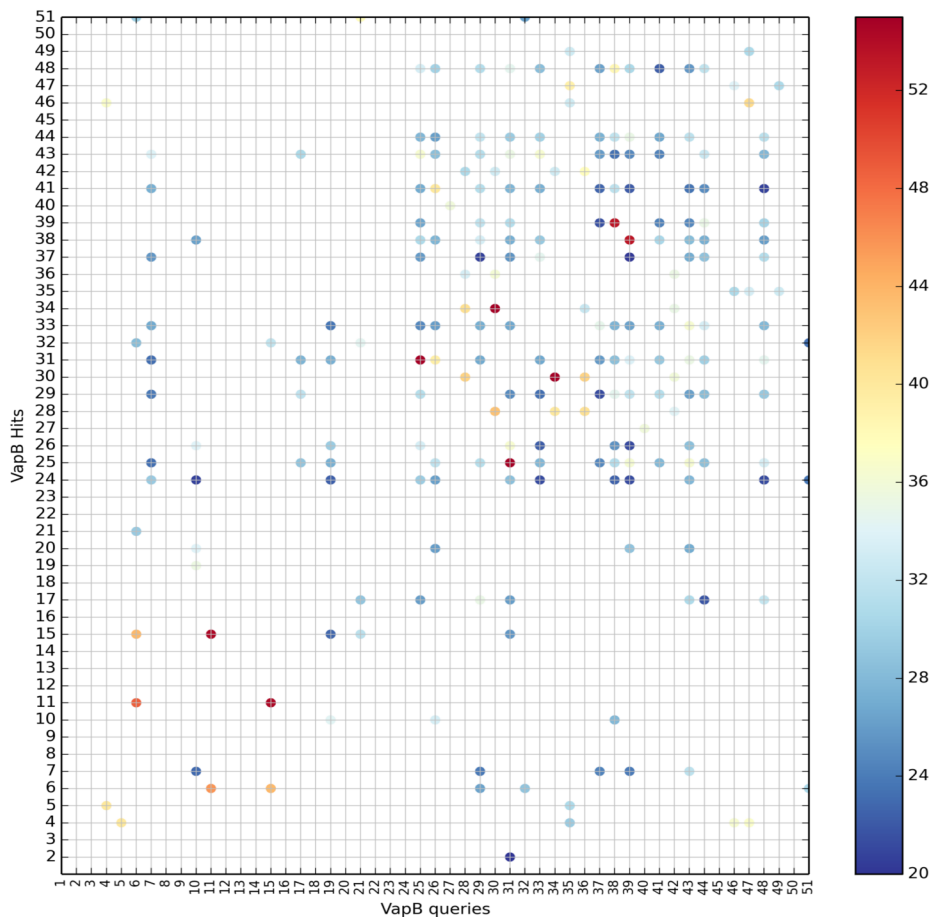

**Figure S1:** Paralogous VapBC TA within the *M. tuberculosis* genome: Plots show the hits for individual VapC toxin queries (**A**) and VapB antitoxin queries (**B**) in PSI-BLAST searches within the *M. tuberculosis* genome. Each dot represents a hit (on y-axis) for each query in the X-axis. For consideration as a hit, an e-value cut-off of 0.0001 was imposed in the PSI-BLAST searches. Searches were performed till convergence of the runs or a maximum of ten iterations. The color of each dot represents the percent sequence identity of a hit for the query. This ranges from blue-red depending on the sequence identity score. For the purpose of clarity, self-hits that fall along the diagonal of the plot are not reported in the figure and the sequence identity for toxins is capped at a maximum value of 50% and for antitoxins at 55%.

**A**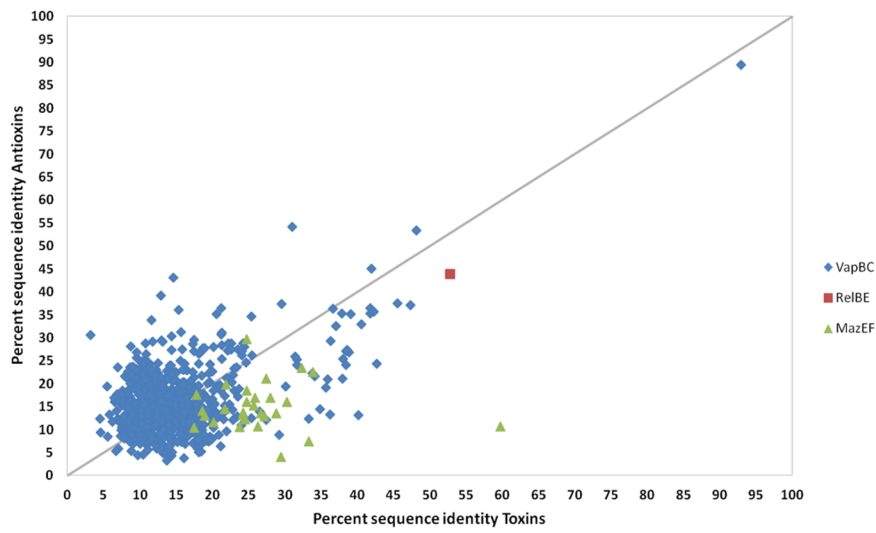**B**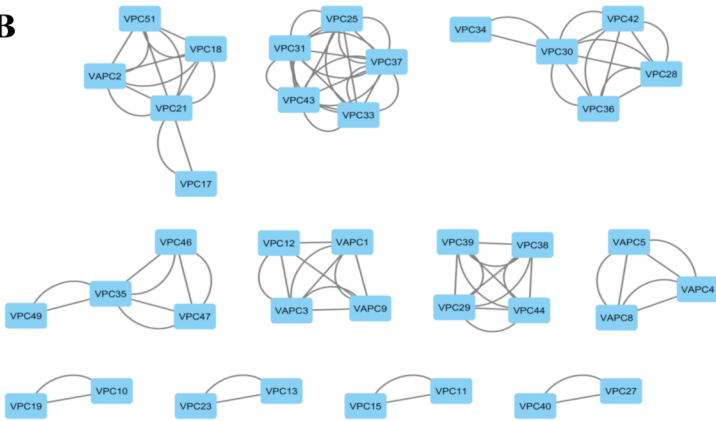**C**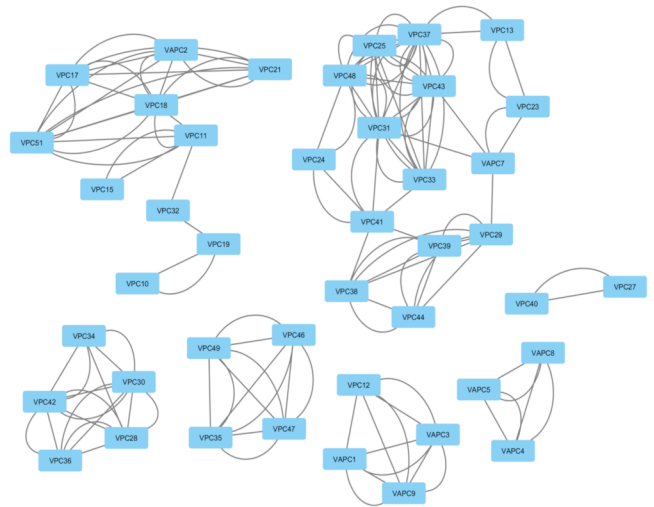**D**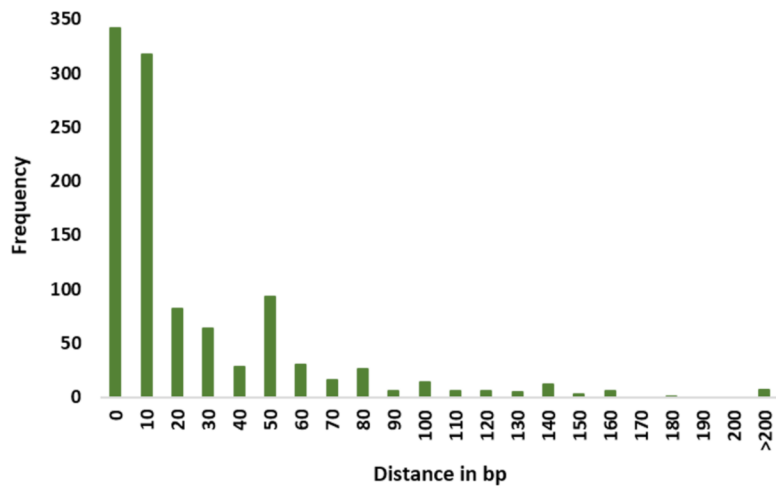**E**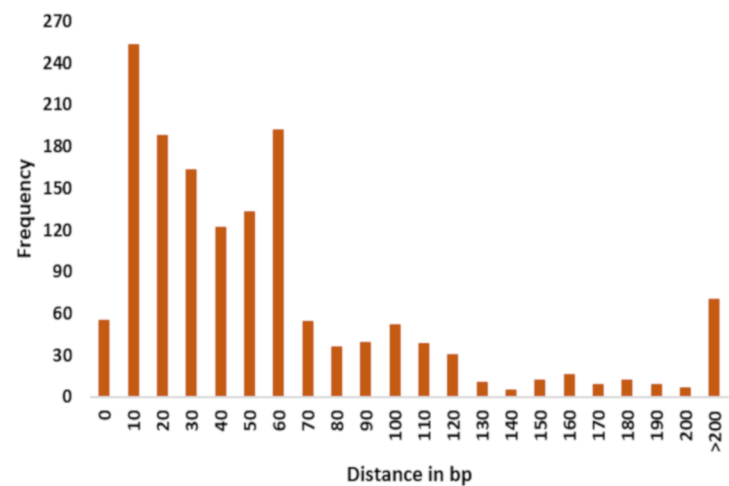

**Figure S2 : (A)** Scatter plot comparing the distribution of sequence identity between the various toxins along the X-axis and their cognate antitoxin pairs in the Y-axis. For VapBC toxins, for e.g, percentage sequence identity scores of each VapC toxin with every other VapC toxin is determined. Likewise, the sequence identity score of each VapB antitoxin with every other VapB antitoxin is determined. The points on the plot show the distribution of scores for each such pair. VapBC scores are represented using blue diamonds, MazEF with grey triangles and RelBE with red squares. Clustering of *M. tuberculosis* VapC toxins at search thresholds of 60% query coverage and **(B)** 30% and **(C)** 25% sequence identity. 11 and 7 distinct clusters were formed separately. Histogram of distances (in bp) between the homologues of *M. tuberculosis* toxin and antitoxin detected for **(D)** mycobacteria and **(E)** other prokaryotic genomes.



# A Sub-cluster 1

```

sp|VAPC7_MYCTU 1 .MIVLDITVVLVYAKGAEHPLRDPQRDVAAIAADERIAATTTAEVIQEFVHVRRARRR.....DRSDAAALGRV.TMPCNSRRYSPSIEATS....
sp|VPC13_MYCTU 1 .MILVDSNIPMYLVGASHPHKLDQRLESALSGGERLVTDAEVLQETCHRXYV.....AIKRRRAIQPAFDATIGVVDEVLP IERTDV...
sp|VPC23_MYCTU 1 .MIFVDITNIFMYAVVGRDHPDRMPARELEHSLHAGDRVLVTSAEAMQELVNAVY.....PVGRRNSTLDSA.LTLVLRALTEIWPVEAADV...
sp|VPC24_MYCTU 1 .MISIDITNILLYQNRDCEPHDAAAAFV.LV.ECAGRADVAVCELVLMEIYOLLRNPTVVTR....PLEGPEAAEVC.QTFRNRNRWALLEAPVMNE...
sp|VPC25_MYCTU 1 .MPLLDANVLLAAARRGDHPNHRVTRPWFDRLLAADDPPFTVPLVWASFLRLLTNRRIFFET....PSPRABAFV.EAVTAQPHHLP TSPGPRHMLV...
sp|VPC31_MYCTU 1 .MPLLDANVLLAAARRGDHPNHRVTRPWFDRLLAADDPPFTVPLVWASFLRLLTNRRIFFET....PSPRABAFV.EAVTAQPHHLP TSPGPRHMLV...
sp|VPC43_MYCTU 1 .MLICVDNVLVYARRADLREHADRGLERLERLANDEPLGLPDSVLGAFTRVVTNRRIFFET....PTSPQDAQAV.DALLAAPAAMRLRPGERHMA...
sp|VPC37_MYCTU 1 .MIIIDANVLLYAVITGFPOHRAHAWQDTSAGADRVGFAPVPLLAFLRIATSKVGLFPR....PLFTADAIYV.REWLSQPNVDLLTAGFRHDI...
sp|VPC39_MYCTU 1 .MIIIDANVLLYAVITGFPOHRAHAWQDTSAGADRVGFAPVPLLAFLRIATSKVGLFPR....PLFTADAIYV.REWLSQPNVDLLTAGFRHDI...
sp|VPC48_MYCTU 1 .MSTFDVIVLVHATHRASPHDKAKTIVVERELAGPGLVYLLWVPLGLVRLVTHPTLLGA...PLAPEVAVENT.EQTSRPHVQVGEANGFV...
sp|VPC41_MYCTU 1 .MLLIDITNILLYALSQGHVHRRARAWLD.TINAPGVHFCRATQOGLRLLLTNRVTLGAYGSPPLTNREAAV.AAFLLDDDRIVLAGAEPDGLEAQ...
sp|VPC29_MYCTU 1 .MIVLLDANVLLIALVVAHVHDAADWL...MASDTGATCPMTQOSLVRFLVRS...GQSAARAVDV.SAVQCTSRHEEFPDALS...
sp|VPC38_MYCTU 1 .MALLDANVLLALVADSHIHARIREWF...TANATLGWATCPLTEAGFVRVSTNPKVLP...AIGIADARRV.VALRAVGGHRLADDVSLV...
sp|VPC39_MYCTU 1 .MALLDANVLLIALGWPNHVHRAAQRWF...TQFSSNGWATTPITEAGYVRVSSNRVSMQV...STTPAIAIAGL.AAMTSLAGHTFNPDDVPLIV...
sp|VPC44_MYCTU 1 .MALLDANVLLIALLDRDHVDHERARAWI...TQIERGWASCAITQNGFVRVVISQPR.YPS...RISVAHAIIDL.ARATHTRYHEFWSCVTSILD...
consensus>70 .m...D.nv1.....h.....r.....a.....

```

```

sp|VAPC7_MYCTU 84 KRGLTIFETIPGLEACDAVLAAVLAASAGATALVAD.PAFADLSDVVHVIPDAAGMVSLGDR
sp|VPC13_MYCTU 83 EHARDALLRYQILSARDALHIAVMAHDITRLMSFD.RGFDSYPGKRLA.....
sp|VPC23_MYCTU 82 AHARTLHRRHPGLGARDLHLACQRRGVTRIKTFD.HTLASA.....FRS.....
sp|VPC24_MYCTU 90 VVWLAATPRIARRRLLPDAALALTRRHGHVDEPATRNINGFTDFGFSR.VWDPITS....DG
sp|VPC25_MYCTU 92 LRKLCDEADASGDLIPDAVLCATIAVEHH.CAVVSLD.RDFARFASVRHRRPPI.....L
sp|VPC31_MYCTU 92 LRKLCDEADASGDLIPDAVLCATIAVEHH.CAVVSLD.RDFARFASVRHRRPPI.....L
sp|VPC37_MYCTU 92 FRQLASDVANGNDIADAHLAAYALENN.ATVLSAD.RGFARFRRLR.WRHPLDGQTH....L
sp|VPC33_MYCTU 92 AGLLDKLGFTASHLTDVQLAAYCIEYD.AEIHSSD.TDFARFADLK.WTDPALRE.....L
sp|VPC37_MYCTU 92 LARMLTYVGTGANLVNDAHLAALAVEHR.ASIVSYD.SDFGRFEGVR.WDQPPAL....L
sp|VPC48_MYCTU 93 YRRVADPVKPRGNLVPDAHLVALMRHGIATVSHD.RDFRKFEGIR.IRDPFSG.....L
sp|VPC41_MYCTU 96 WRFAVVRQSPAPRVWMDAYLAAPALTTGG.FELVTD.TAFTQYGGIE.LRLLAK.....L
sp|VPC29_MYCTU 81 FAGVEVAGVVGHRQVTDAYLAQLARSHD.GOLATLD.SGLAHLHGDAVLIPIPTT....L
sp|VPC38_MYCTU 88 .DDDVPLVGYRQVTDHLLTLARRR.VRLVTFD.AGVFTLAQR.PKTPVELLTI....L
sp|VPC39_MYCTU 90 GSAGDRDAYSNHRRTDCHLIALAARYG.GRLVTFD.AALADSASAGLEV.....L
sp|VPC44_MYCTU 89 SKVIDRSRLHSPKQVTDAYLLALVAHD.GREVTFD.QSIALTAVPGATKQHLAT....L
consensus>70 .....Da.l.a.....#.....

```

# B Sub-cluster 4

```

sp|VPC35_MYCTU 1 .MIYLETSAIVKLIIRIEVESDALADWLD.....DRTELRWITSALTEVELSRAIRAV
sp|VPC46_MYCTU 1 MAAIYLDSSAIVKLAIVREPEESDALRRYL.....RTRHPRVSSALARAEVMRRLLDK
sp|VPC47_MYCTU 1 .MIYMDTSAITKLLISEPETTELRLWLTA.....SQGEDAATSTLGRVSMRVVARY
sp|VPC49_MYCTU 1 MP.LVYFDASAFVKKLITTEGSLASA.LWDGCDAAALSSRLAYPEVRAALAAARNHDLTES
consensus>70 .....m!Yl#.SA.vKL...E.es.l.a.l.l.....r...v.sal...e...r...

sp|VPC35_MYCTU 52 S.PEGLPAPVSVLALDRREEDDAVIRSTAAAYPNP.ALRSLDAIHLATAQTAGSVAPLTA
sp|VPC46_MYCTU 52 G.E.SARKAGRRALAHLDLRLVDKRVLDIAGGLLPF.ERLTLDAIHLATAQRLL...VDLGR
sp|VPC47_MYCTU 54 GQPQTERARYLLDGLDILLETETPVIQIETIGPA.TLRSLDAIHLATAAQIK...RELLA
sp|VPC49_MYCTU 61 ELDAERDWEDEWATRPELETAVEQHAGHLARAHALRGADAVHLASALAVG...DPGLV
consensus>70 .....l.a.l.d.....!...A.....LR.lDA!HLA.A...g...l...

sp|VPC35_MYCTU 110 LVTYDNRLLKEAAEALS LAVVAPGQAR.
sp|VPC46_MYCTU 108 LCTYDDRMRDAAKTLGMVAIP.S...
sp|VPC47_MYCTU 111 FVTYDHRLLSGCREVGFVITASPGAVR.
sp|VPC49_MYCTU 119 VAVWDRRLHGTGAHAGC.RVAPAQLDP
consensus>70 ...tyD.R$.a...g...vaP...

```

# C Sub-cluster 5

```

sp|VAPC1_MYCTU 1 M.....DECVVDAAVVDALAGKASAIVLRGLLKEISNAPHLLDAEVEGHALRRAV
sp|VAPC9_MYCTU 1 .....MIVDASAALAALLNDGQA...RQLIAAERLHVPHLVDSIASGLRRLA
sp|VPC12_MYCTU 1 .....MIVLDSAAVELMLTTFAGAAVARRL.RGETVHAPAHFDVEVICAIRQAV
sp|VAPC3_MYCTU 1 MRASPTSPPEQVVVDASAMVDLLARTSDRCSAVRARLARTAMHAEAHFDAEVLSALGRMO
consensus>70 .....iVvDAsA.vd.$.....R.l.....haP...D.E!..alrr..

sp|VAPC1_MYCTU 53 LSDEISEEQARAAALDALPYLINDNRYPHSPRLIEYTWQIRHNVTFYDAILYVALATALDVPV
sp|VAPC9_MYCTU 47 QDRRLGAADGRRALQTWRRLAVTRYPVVG.LFERIWEIRANLSAYDASYVALAEALNCAL
sp|VPC12_MYCTU 50 VRQLISDHEGLVVVNVNLSLPLVRRWPLKPF.TQRAYQLRSTHTVADGAYVALAEGLVV
sp|VAPC3_MYCTU 61 RAGALTVAYVDAALEELRQVPTVRHGLSS.LLAGAWSRDTLRLTDAILYVELAETAAGLV
consensus>70 ...d.....q...ald...l.v.r.p...l.e...wg.R.....Da.YVaLaE.l...L

sp|VAPC1_MYCTU 113 L T G D S R L A A A P G L P C E I K L V . R
sp|VAPC9_MYCTU 106 V T A D L R L S D T G A Q C P I T V V P R
sp|VPC12_MYCTU 109 I T C D G R L A Q S H G H N A E I L V . A
sp|VAPC3_MYCTU 120 L T T D E R L A R A W P S A H A I . . . G
consensus>70 .T.D.RLa.....I.v..

```



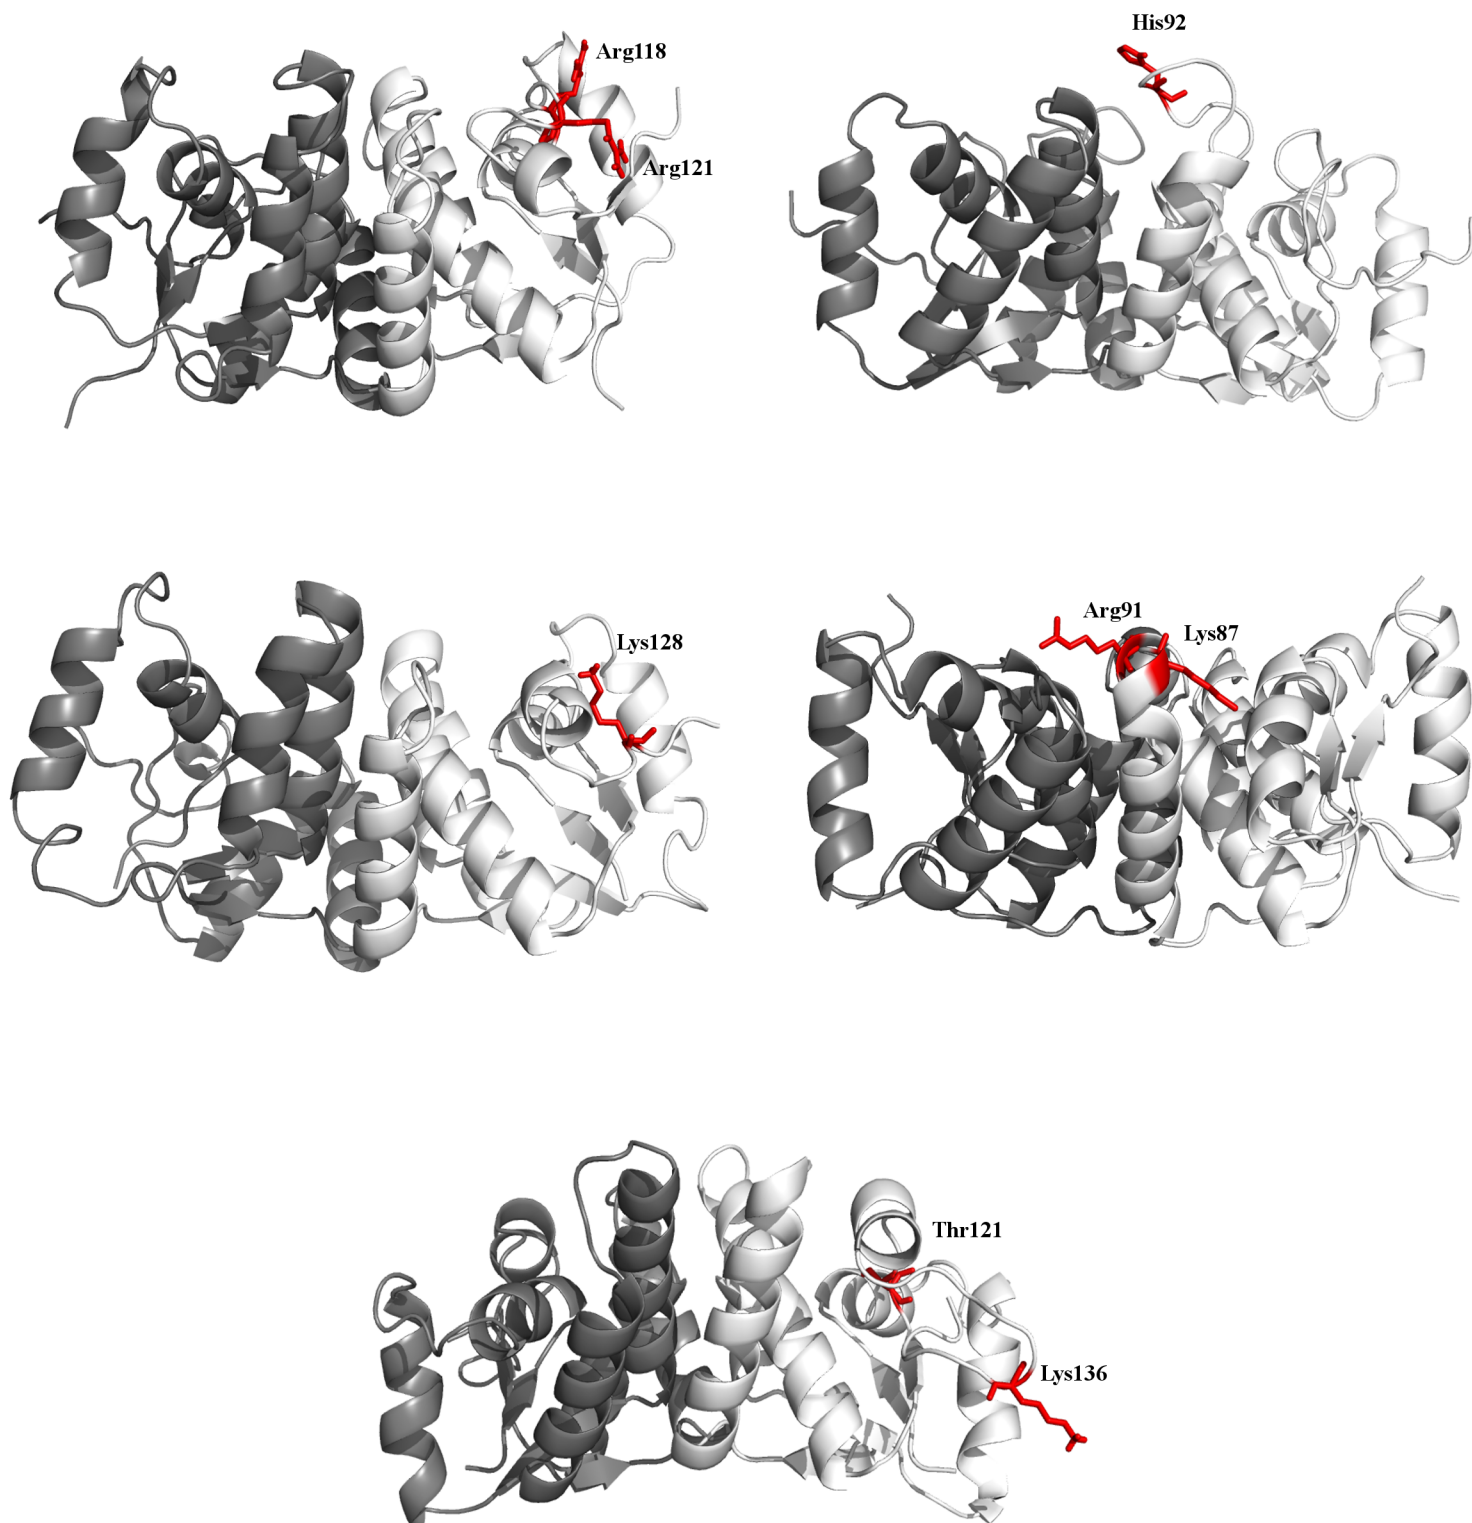

**Figure S5:** Structural models for various toxins used for computational alanine scanning. The models for Rv0528c, Rv0609, Rv1838c and Rv3320c were generated by modeller v9.14 using templates identified by Phyre2. The structure for Rv2757c was obtained from PDB (5sv2). The residues predicted to be important for toxin function that were mutated in experiments are shown in red sticks.





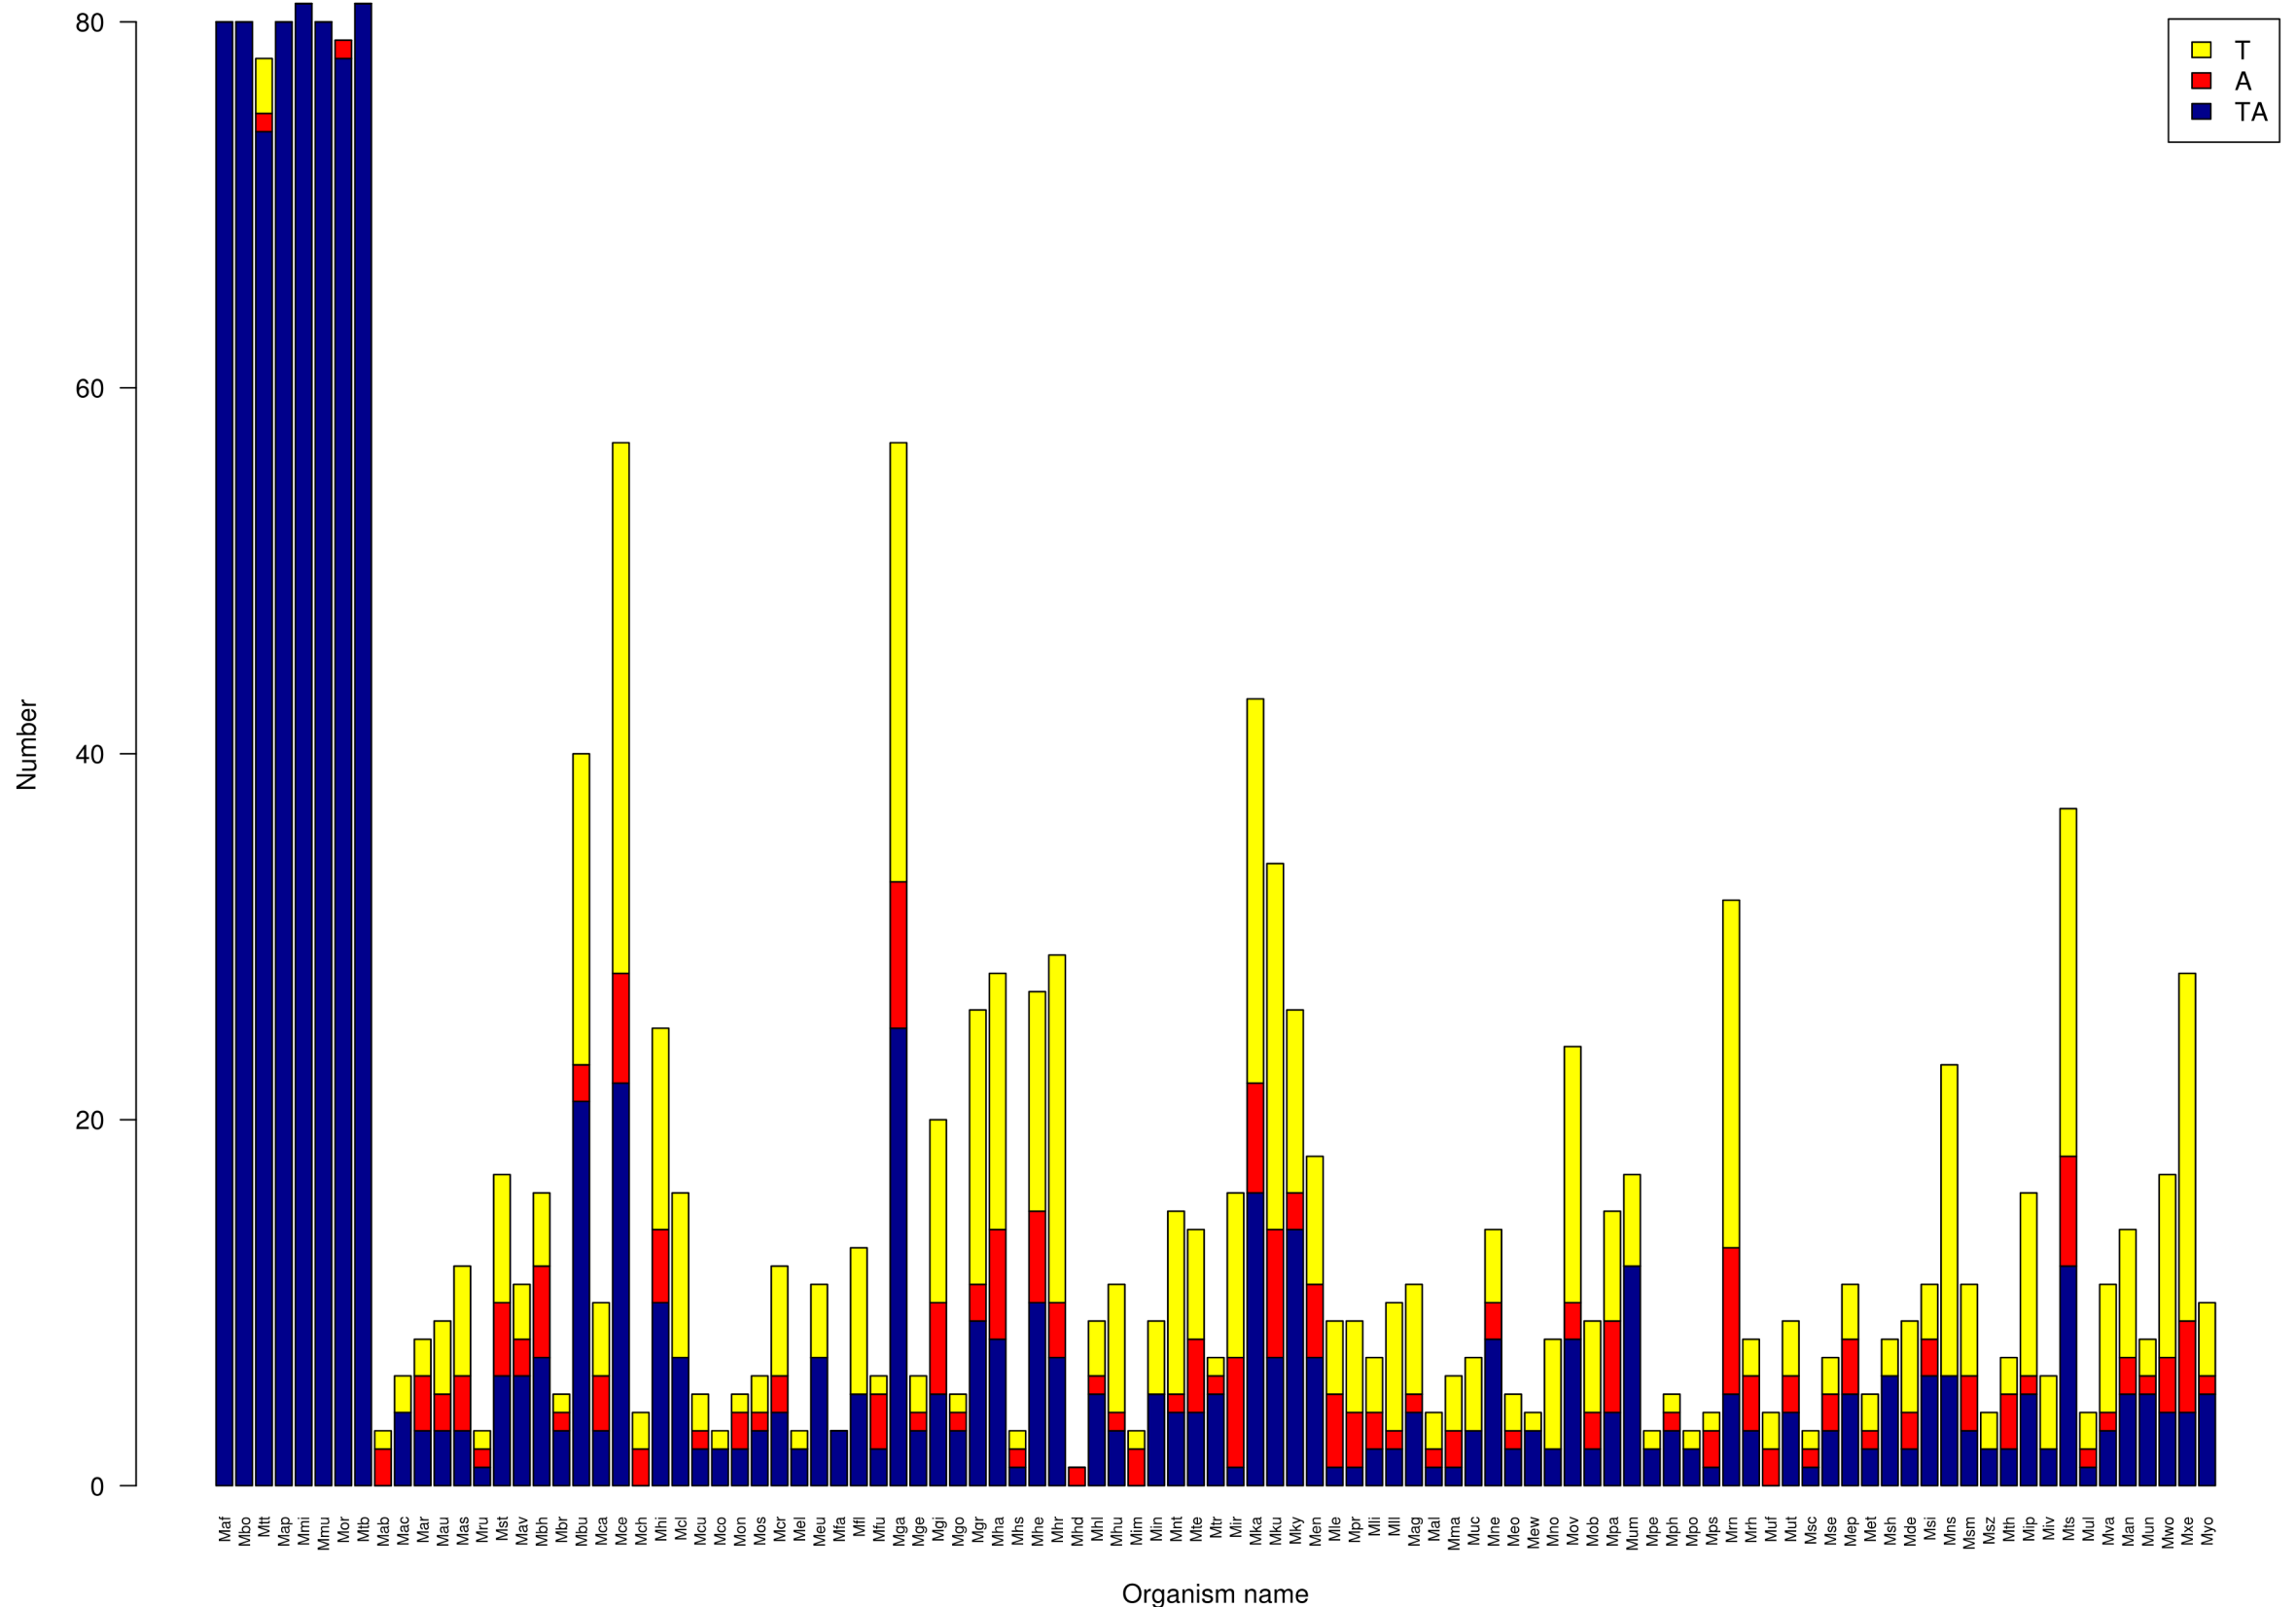

**Figure S7: Plot showing the distribution of *M.tuberculosis* TA in the genus *Mycobacterium*.** Relative abundance of the toxin and antitoxin homologues in the genus *Mycobacterium*. The *Mycobacteria* species employed in this study are listed on the X-axis using three letter codes to designate the organism (Mapping file of the code to organism name is in Table S7). The Y-axis shows the number of toxin/antitoxin/ TA pairs that were detected in the PSI-BLAST searches performed in the various genomes. Members of the MTBC complex are listed first.



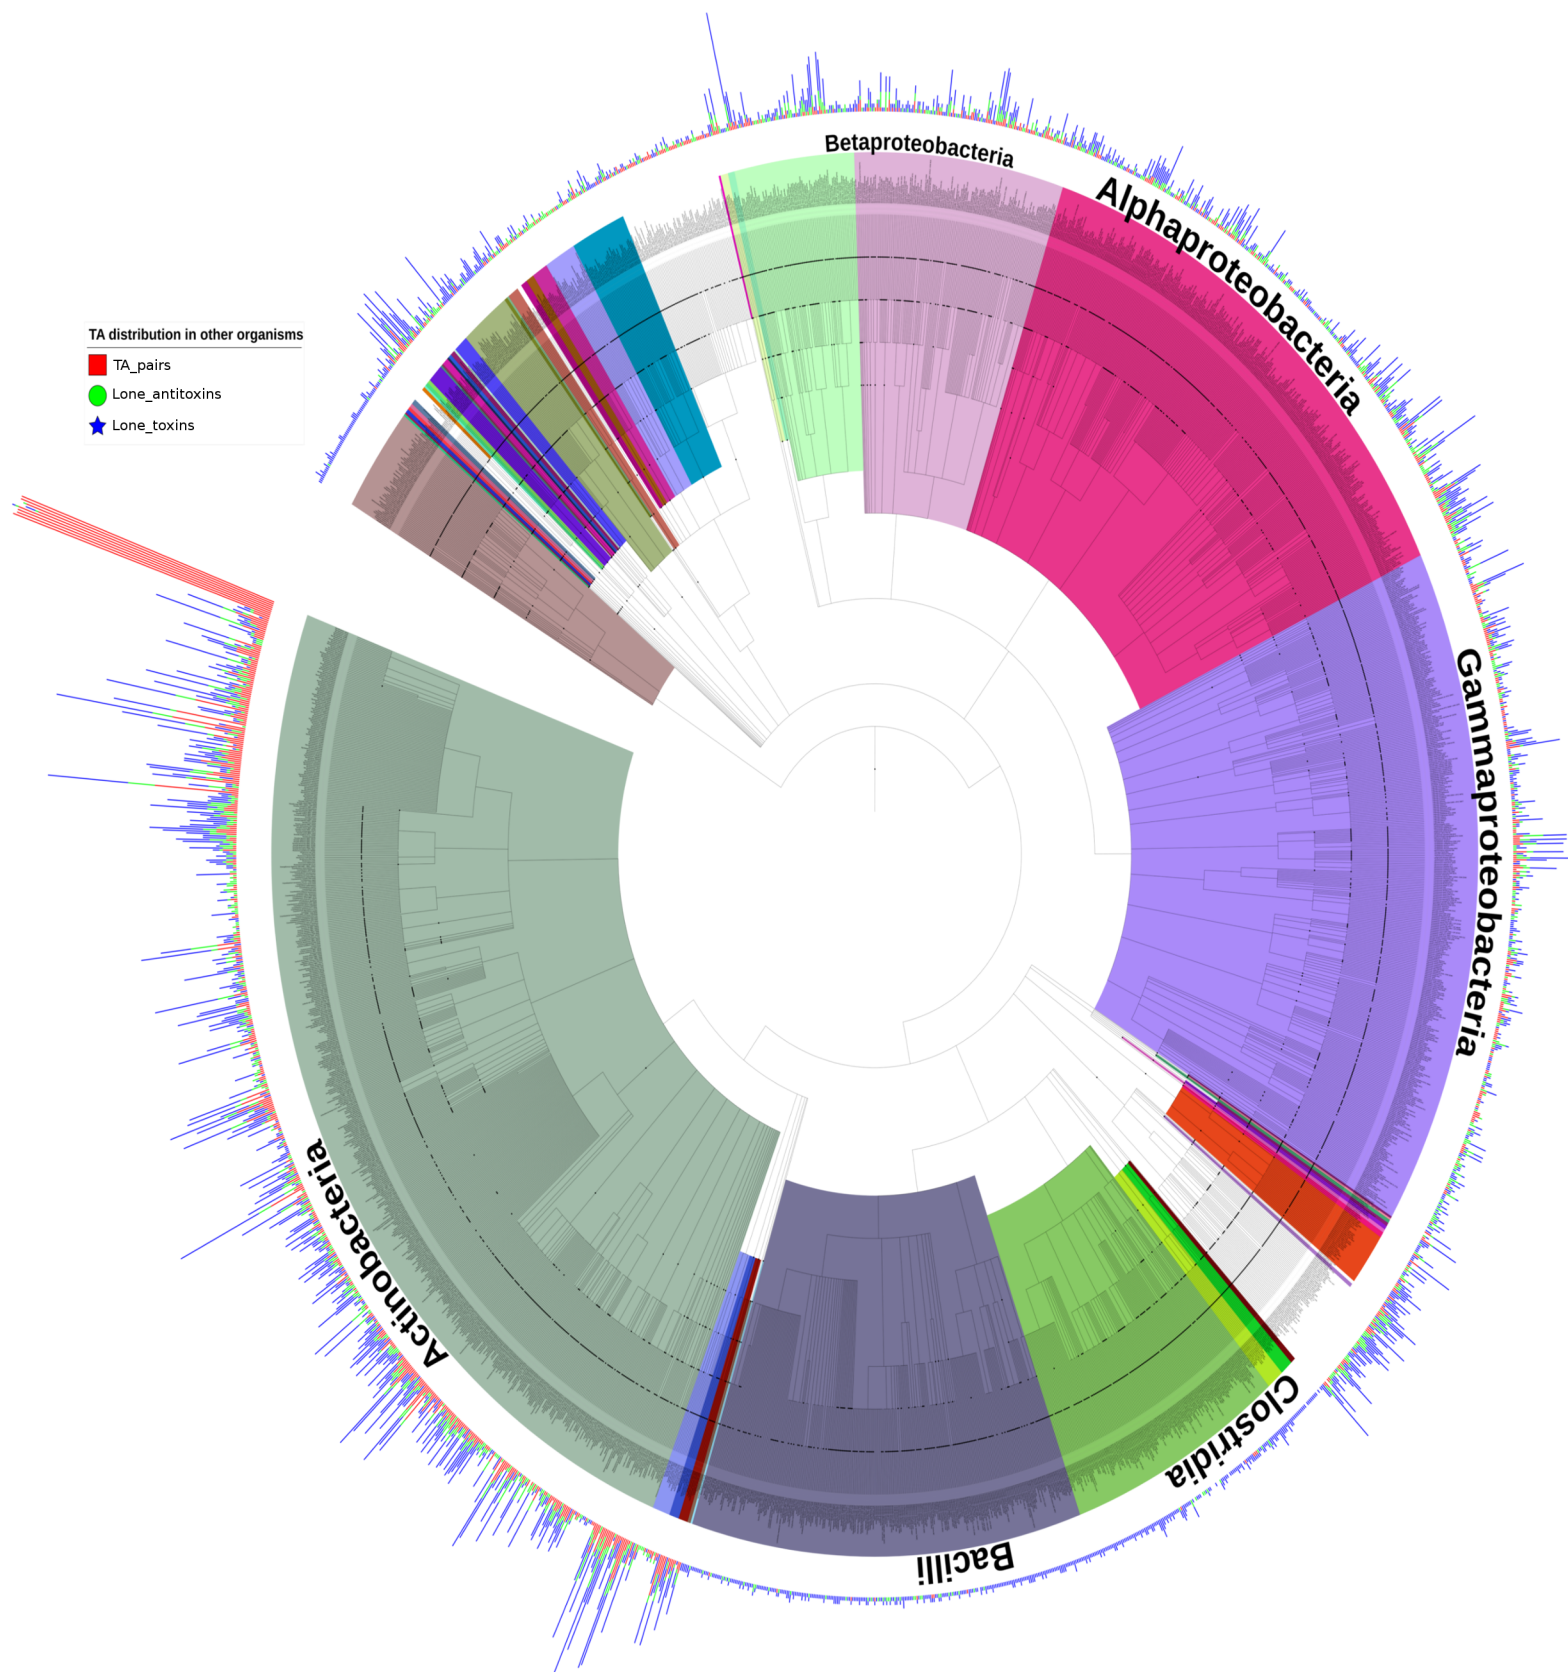

- |                |                  |                   |                        |                 |                  |                 |                 |                  |             |
|----------------|------------------|-------------------|------------------------|-----------------|------------------|-----------------|-----------------|------------------|-------------|
| Acidobacteria  | Chrysiogenetes   | Chlorobia         | Alphaproteobacteria    | Chlamydia       | Spartobacteria   | Coriobacteria   | Caldilineae     | Deinococci       | Thermotogae |
| Blastocatellia | Bacteroidia      | Ignavibacteria    | Betaproteobacteria     | Kiritimatiellae | Verrucomicrobiae | Nitiliruptoria  | Chloroflexia    | Bacilli          | Archaea     |
| Holophagae     | Chitinophagia    | Gemmatimonadetes  | Deltaaproteobacteria   | Lentisphaeria   | Spirochaetia     | Rubrobacteria   | Dehalococcoidia | Clostridia       |             |
| Solibacteres   | Cytophagia       | Fusobacteriia     | Epsilonaproteobacteria | Phycisphaerae   | Synergistia      | Thermoleophilla | Ktedonobacteria | Erysipelotrichia |             |
| Aquificae      | Saprosipria      | Nitrospira        | Gammaproteobacteria    | Planctomycetia  | Acidimicrobia    | Fimbrimonadia   | Thermomicrobia  | Negativicutes    |             |
| Calditrichae   | Sphingobacteriia | Acidithiobacillia | Zetaproteobacteria     | Opitutae        | Actinobacteria   | Anaerolineae    | Gloeobacteria   | Tissierella      |             |

**Figure S9: Phylogenetic tree showing distribution of *M.tuberculosis* TA across prokaryotic taxa.** 2220 genomes containing homologues of TAs have been grouped into 54 classes shown in different colors. The organisms that are not shown in color have not been assigned a class according to NCBI taxonomy database. Outer bar-plot shows the number of *M.tuberculosis* TA homologs found in these organisms. An interactive link to this tree can be accessed at <https://itol.embl.de/tree/1413912822138041518174018> where the user can hover over the tree branches for detailed data visualization. For best visibility, users are advised to visualize the tree in Firefox browser.

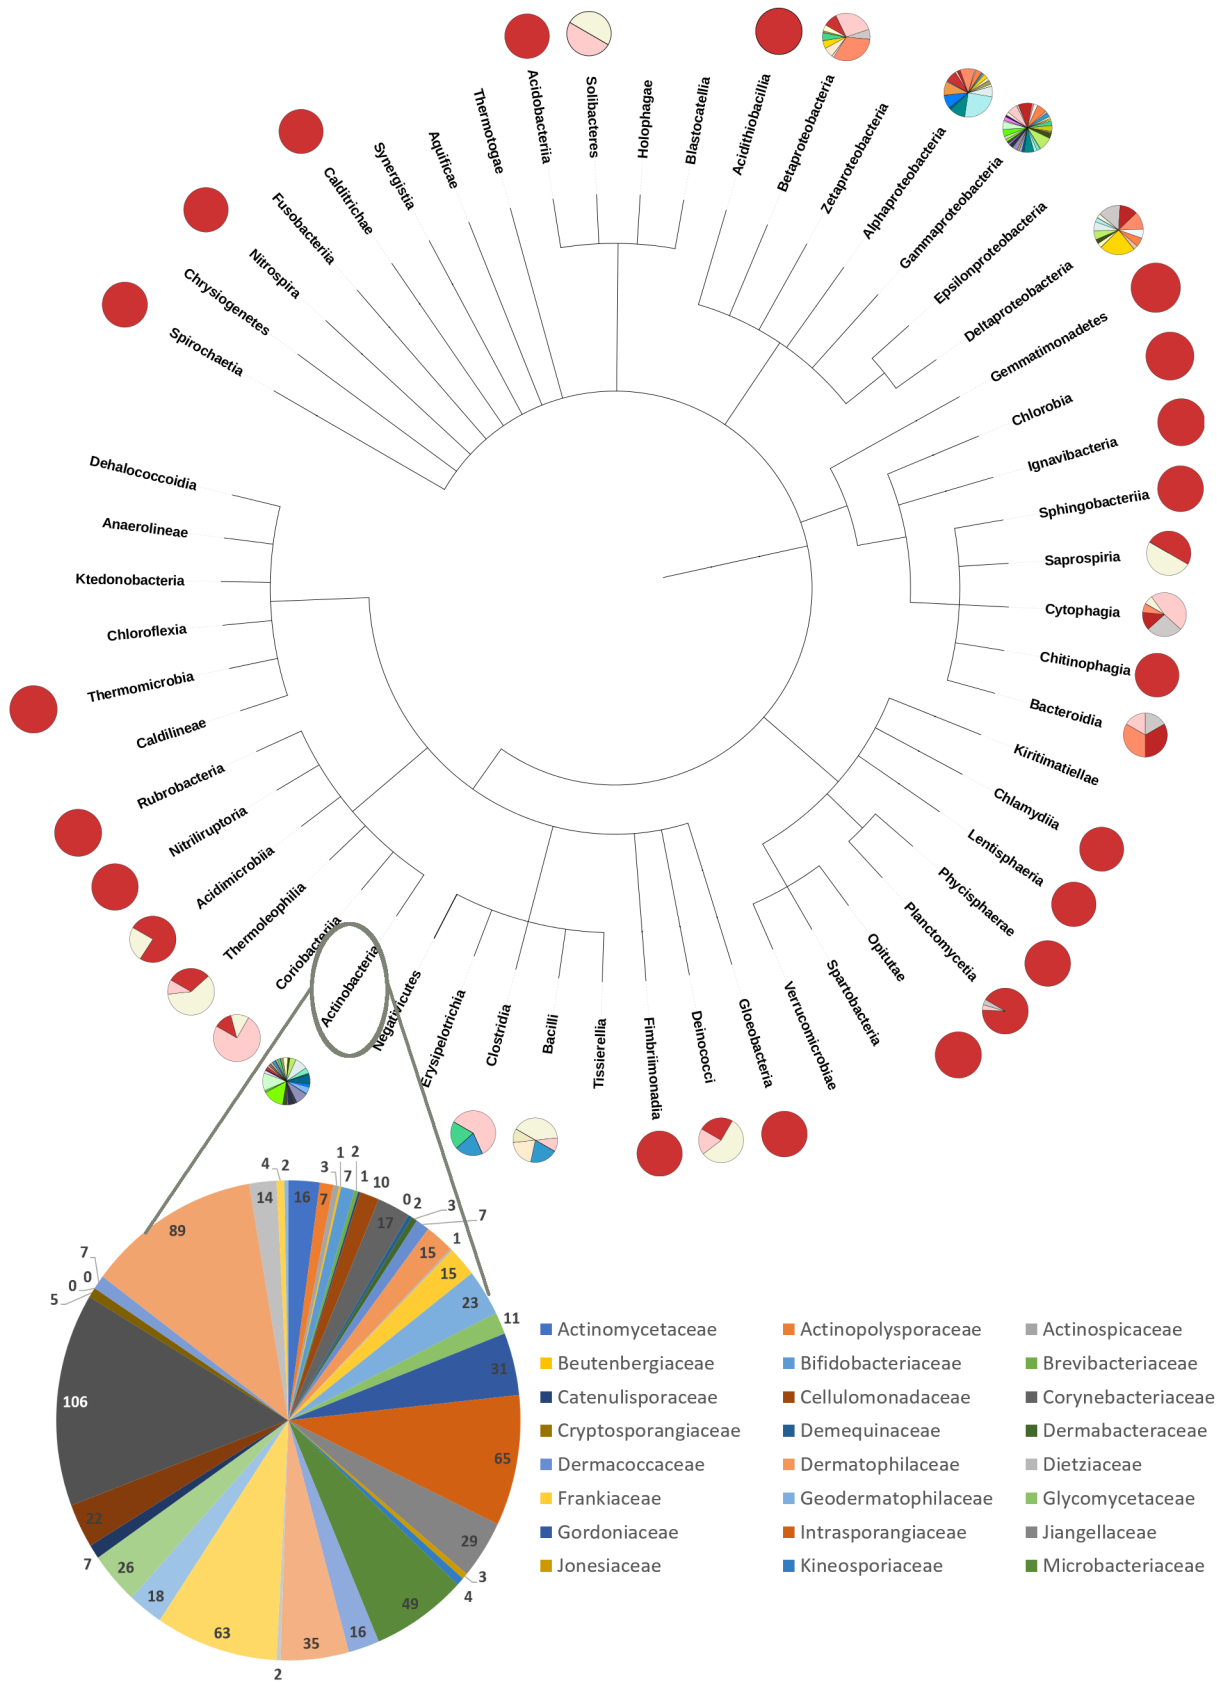

**Figure S10: Distribution of *M. tuberculosis* TA in various prokaryotes, organized in a class-specific manner.** Unrooted tree with class-specific pie-charts on the nodes provide the number of TA pairs in each constituent family. As an example, inset shows the number of TA pairs in various families of class Actinobacteria. An interactive link to this tree can be accessed at <https://itol.embl.de/tree/1413912822265121518597108> where user can hover over the pie-charts for families in various classes. For best visibility, users are advised to visualize the tree in Firefox browser, setting the font style to 70.



E

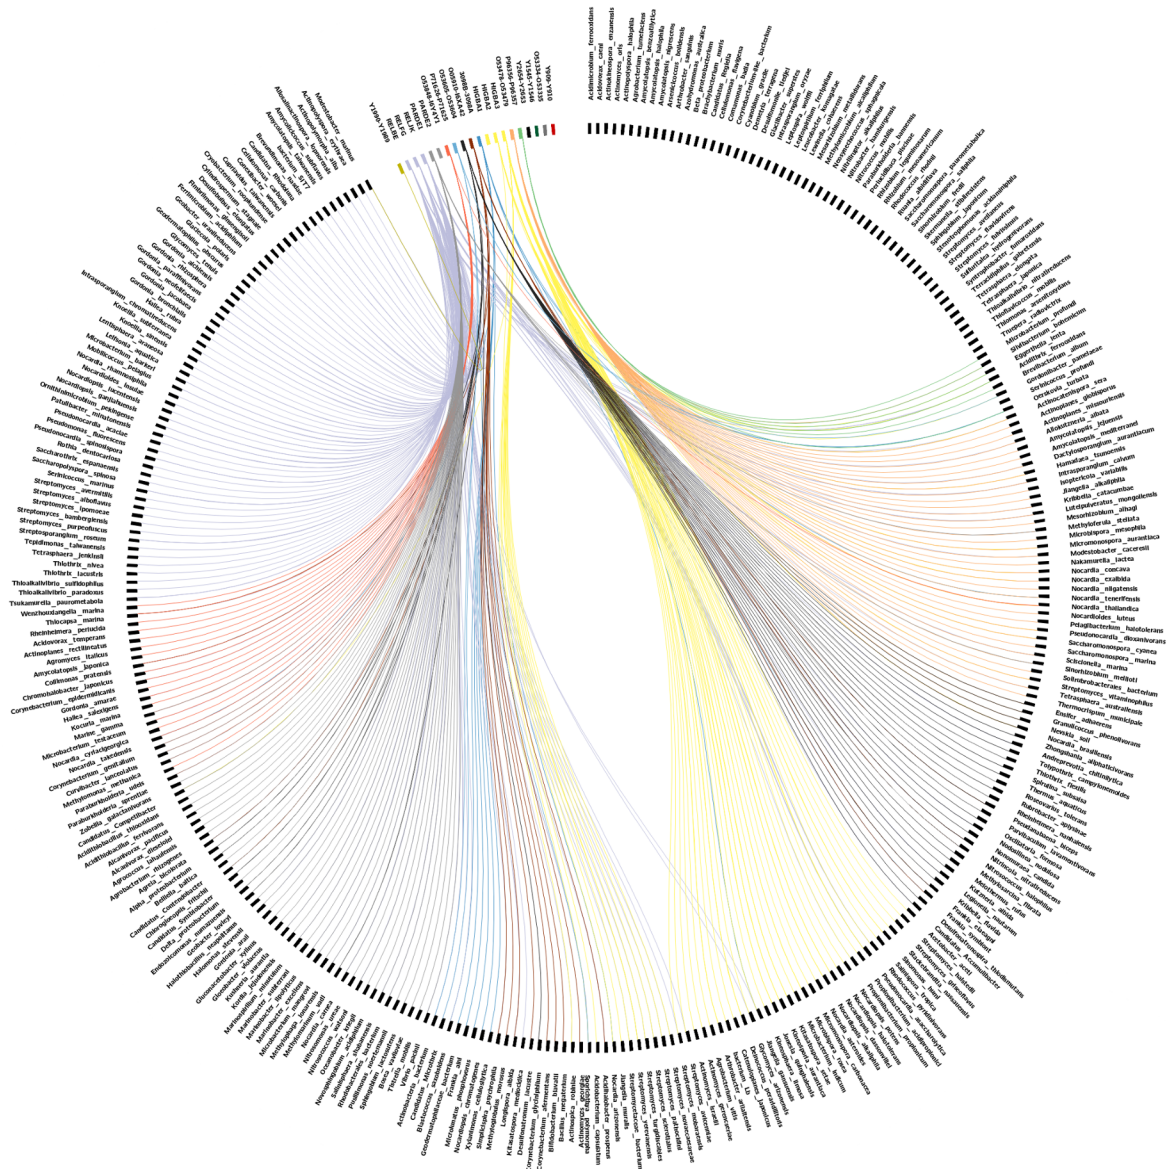

**Figure S11: Circos plots showing the distribution of *M. tuberculosis* TA pairs in all 2220 prokaryotes. (A-C) show the distribution of VapBC, MazEF and other TA respectively. Plots help infer that some TA such as VapBC32 are extensively well conserved in many of the prokaryotes surveyed here. The number of homologues of MazEF TA system in the various prokaryotes is far fewer as shown in (B). As shown here, Rv0909-Rv0910 is the only TA although universally present in mycobacteria is absent in prokaryotes (C).**

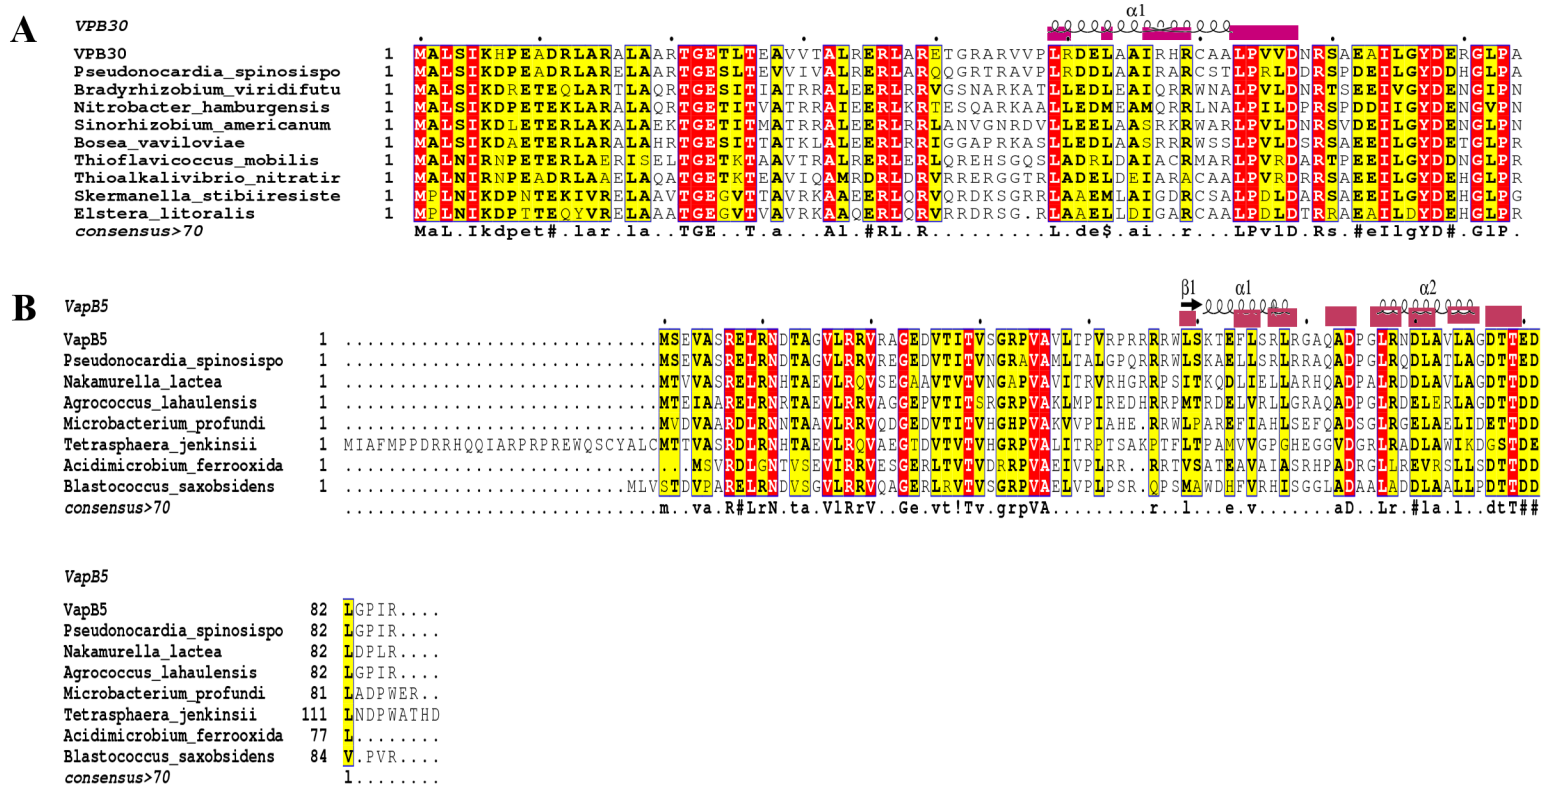

**Figure S12:** Multiple sequence alignment of *M.tuberculosis* (A) VapB30 (4xgq) with top 10 orthologues from the prokaryotic genomes. (B) VapB5 (3dbo) with top 10 orthologues from the prokaryotic genomes. The columns shaded dark red show conserved residues while columns shaded yellow show conservatively substituted residues. Secondary structure elements of the reference structures are depicted on top of each alignment. Pink colored boxes on top of the alignment are the toxin-binding residues in the reference structures. Consensus sequence (at a threshold > 70%) for the alignment is shown at the bottom of the alignment.

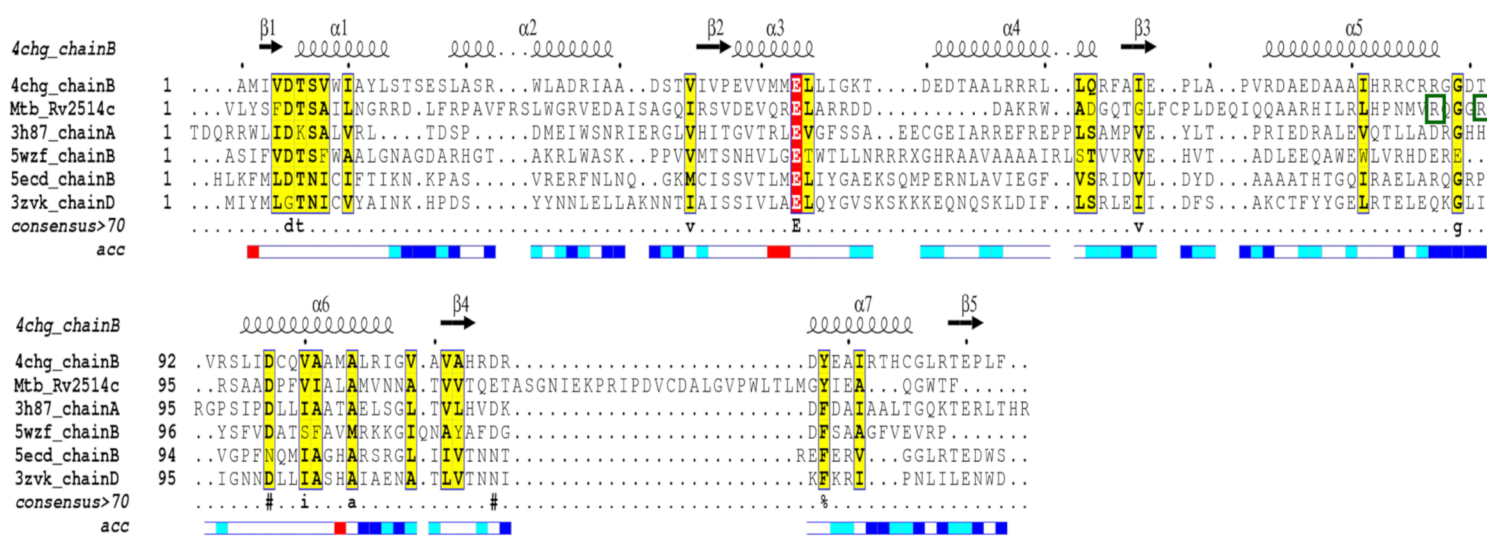

**Figure S13: Alignment of Rv2514c with homologous VapC toxins from various organisms.** The columns shaded dark red show conserved residues while columns shaded yellow show conservatively substituted residues. The two residues chosen for mutations are marked in green boxes. Consensus sequence (at a threshold > 70%) is shown at the bottom of the alignment. Solvent accessibility of the reference structure, shown using the Esript colour convention with dark blue indicating exposed residues, cyan showing partially exposed residues and white for buried residues (and red for residues for which this value could not be determined), is shown at the bottom of the alignment.



| 3SHG:A PDBID CH  | η1  | T     | TTT         | α1                   | α2         |      |        |       |          |        |     |      |     |     |      |         |       |       |       |      |       |      |     |     |      |      |     |     |
|------------------|-----|-------|-------------|----------------------|------------|------|--------|-------|----------|--------|-----|------|-----|-----|------|---------|-------|-------|-------|------|-------|------|-----|-----|------|------|-----|-----|
|                  | 022 | ..... | T           | 00000000000000000000 | 0000000000 |      |        |       |          |        |     |      |     |     |      |         |       |       |       |      |       |      |     |     |      |      |     |     |
| 3SHG:A PDBID CH  | 1   | VRKYE | GSNDP       | YTD                  | ETGVMY     | LLIG | TKDQAR | LERVE | SAF      | AYIRS  | FEL | GRT  | SI  | ..  | SGK  | FDD     | DHMKK | IKK   | LF    | GDVY |       |      |     |     |      |      |     |     |
| rv3641c          | 1   | MPHP  | WDTGDHERN   | WQGF                 | YFIP       | AMS  | VLRN   | RVG   | ARTHAE   | LDAEN  | DL  | VEAR | VEL | RED | P    | NLLGD   | R     | DLAY  | LRA   | HRQL | LFQ   | DIY  |     |     |      |      |     |     |
| A0A0451LG3_3_21  | 1   | ..    | HPWDTGDHERN | WQGF                 | YFIP       | AMS  | VLRN   | RVG   | ARTHAE   | LDAEN  | DL  | VEAR | VEL | RED | P    | NLLGD   | R     | DLAY  | LRA   | HRQL | LFQ   | DIY  |     |     |      |      |     |     |
| A0A1X0FM8_3_21   | 1   | ..    | HPWDTGDHERN | WQGF                 | YFIP       | AMS  | VLRN   | RVG   | ARTHAE   | LDAEN  | DL  | VEAR | VEL | RED | P    | NLLGD   | R     | DLAY  | LRA   | HRQL | LFQ   | DIY  |     |     |      |      |     |     |
| UPI00061B5852_4  | 1   | ..    | PWDTGNLE    | ERNWQGF              | YFIP       | GT   | ILRN   | RVG   | ARTRDL   | LRDAEN | DL  | VEAR | VEL | RED | P    | ELLVGR  | T     | YDLAY | LKA   | HRQL | LFQ   | DVY  |     |     |      |      |     |     |
| G41GD3_3_211     | 1   | ..    | HPWDTGNLE   | ERNWQGF              | YFIP       | GT   | ILRN   | RVG   | ARTRDL   | LRDAEN | DL  | VEAR | VEL | RED | P    | ELLVGR  | T     | YDLAY | LKA   | HRQL | LFQ   | DVY  |     |     |      |      |     |     |
| UPI000641ED08_3  | 1   | ..    | HPWETGDLE   | QNWQGF               | YFIP       | GT   | ILRN   | RVG   | AQTPEA   | LQDAEN | DL  | VEAR | VEL | RED | P    | DLN     | GNRT  | YNLAY | LQA   | HRQL | LFQ   | DVY  |     |     |      |      |     |     |
| A1TB85_3_210     | 1   | ..    | HPWDTGDLE   | QNWQGF               | YFIP       | GT   | ILRN   | RVG   | AQTPEA   | LQDAEN | DL  | VEAR | VEL | RED | P    | DLN     | GNRT  | YNLAY | LQA   | HRQL | LFQ   | DVY  |     |     |      |      |     |     |
| UPI000829D5C8_3  | 1   | ..    | HPWVDVGDLE  | QNWQGF               | YFIP       | GT   | ILRN   | RVG   | ARTDDA   | LQNAEN | DL  | VEAR | VEL | RED | P    | DLN     | GNRT  | YNLAY | LQA   | HRQL | LFQ   | DVY  |     |     |      |      |     |     |
| A0A1E8Q945_3_20  | 1   | ..    | HPWETGDLE   | QNWQGF               | YFIP       | GT   | ILRN   | RVG   | AVTSEAL  | LRDAEN | DL  | VEAR | VEL | RED | P    | ELAGERT | Y     | DLTY  | LQA   | HRQL | LFQ   | DVY  |     |     |      |      |     |     |
| UPI000829D55BD_3 | 1   | ..    | HPWDTGD     | PDNRWQGF             | YFIP       | GT   | ILRN   | RVG   | ATTHAEL  | LQDAEN | DL  | VEAR | VEL | RED | P    | GLL     | TRS   | YDL   | LLLQA | HRQL | LFQ   | DVY  |     |     |      |      |     |     |
| UPI000829D926_3  | 1   | ..    | HPWDTGD     | PDNRWQGF             | YFIP       | GT   | ILRN   | RVG   | ATTHAEL  | LQDAEN | DL  | VEAR | VEL | RED | P    | GLL     | TRS   | YDL   | LLLQA | HRQL | LFQ   | DVY  |     |     |      |      |     |     |
| A0A0E4AF03_3_21  | 1   | ..    | HPWNTGD     | LETDWQGF             | YFIP       | GT   | ILRN   | RVG   | ADTTIEAL | LSDAEN | DL  | VEAR | VEL | RED | P    | GLN     | LDRT  | YNLAY | LQA   | HRQL | LFQ   | DVY  |     |     |      |      |     |     |
| UPI000837787E_2  | 1   | ..    | HPWDTGD     | BAEWQGF              | YFIP       | GT   | ILRN   | RVG   | ATTARAL  | LENAEN | DL  | VEAR | VEL | RED | P    | SVL     | GDRT  | YDL   | IFLLA | HRQL | LFQ   | DVY  |     |     |      |      |     |     |
| A1UQ28_16_224    | 1   | ..    | HPWESG      | DFDQRWRG             | YFIP       | GT   | ILRN   | RVG   | GAATTEAL | LRDAEN | DL  | VEAR | VEL | RED | P    | ILL     | GDRT  | YDL   | AFLLA | HRQL | LFQ   | DVY  |     |     |      |      |     |     |
| UPI0009A7EFC8_6  | 1   | ..    | PWDTGD      | PDKNWSSG             | YFIP       | GT   | ILRN   | RVG   | GALTWEEL | LRDAEN | DL  | VEAR | VEL | RED | P    | ELL     | GDRT  | YDL   | AFLLA | HRQL | LFQ   | DVY  |     |     |      |      |     |     |
| A0A1N0GFW2_4_21  | 1   | ..    | HAWDTGD     | LDQNWQGF             | YFIP       | GT   | ILRN   | RVG   | GATTMTK  | LRDAEN | DL  | VEAR | VEL | RED | P    | MLI     | SART  | YDL   | AHLKA | HRQL | LFQ   | DVY  |     |     |      |      |     |     |
| UPI00029A95B3_6  | 1   | ..    | PWNTGD      | HERDWDG              | YFIP       | GT   | ILRN   | RVG   | GASTVQ   | LHDAEN | DL  | SEVR | LEL | REK | P    | GLV     | VAPRS | YDL   | SHLSA | HRQL | LFQ   | DVY  |     |     |      |      |     |     |
| H5TVL8_4_207     | 1   | ..    | RPWDTGD     | LDNRWQGF             | YFIP       | ASS  | VLRN   | LVH   | ATTHDEL  | LTDAE  | V   | SEYR | LEL | REN | P    | VLT     | GPRS  | YDL   | AHLCA | HRQL | LFQ   | DVY  |     |     |      |      |     |     |
| A0A1I0SZV9_4_20  | 1   | ..    | KPWEND      | DDPQHNWEG            | YFLG       | SS   | ILRN   | LVG   | AVTQEL   | LTDAE  | V   | SEYR | LEL | REN | P    | GIM     | AVRS  | YDL   | HLIRA | HRQL | LFQ   | DVY  |     |     |      |      |     |     |
| A0A135GYB9_6_20  | 1   | ..    | PWETGD      | PQHTDQGF             | YFIP       | GT   | ILRN   | RVG   | ATTHDEL  | LTNAEN | DL  | VEAR | VEL | RED | P    | SVV     | PR    | YDL   | VHLQA | HRQL | LFQ   | DVY  |     |     |      |      |     |     |
| UPI0009DBFCE3_3  | 1   | ..    | PWDTGD      | YDRNWAG              | YFIP       | GT   | ILRN   | RVG   | GATSEAL  | AAAEN  | DL  | VEAR | VEL | RED | P    | GMV     | NRT   | YDL   | PHLKA | HRQL | LFQ   | DVY  |     |     |      |      |     |     |
| A0A1H9QJF1_7_19  | 1   | ..    | ..          | VDP                  | YLD        | PE   | TGLLRN | KVG   | GARTKAAL | DEAEG  | DL  | SFAR | S   | VOL | MDR  | P       | V     | ..    | KPT   | YDL  | PHLKA | HRQL | LFQ | DVY |      |      |     |     |
| A0A1Q2PC0_7_19   | 1   | ..    | ..          | VDP                  | YLD        | PE   | TGLLRN | KVG   | GARTKAAL | DEAEG  | DL  | SFAR | S   | VOL | MDR  | P       | V     | ..    | KPT   | YDL  | PHLKA | HRQL | LFQ | DVY |      |      |     |     |
| UPI000405E865_7  | 1   | ..    | ..          | VDP                  | YLD        | PE   | TGLLRN | KVG   | GARTKAAL | DEAEG  | DL  | SFAR | S   | VOL | MDR  | P       | V     | ..    | KPT   | YDL  | PHLKA | HRQL | LFQ | DVY |      |      |     |     |
| U2QDR9_5_201     | 1   | ..    | ..          | SSRDP                | YVDP       | GT   | ILRN   | LVG   | GARTRAEL | HEVEG  | DL  | SFAR | L   | QLD | LDH  | P       | P     | ..    | KPT   | YDL  | PHLKA | HRQL | LFQ | DVY |      |      |     |     |
| UPI000BBB1953_5  | 1   | ..    | ..          | DDP                  | YLD        | PE   | TGLLRN | KVG   | GARTKAAL | DEAEG  | DL  | SFAR | S   | VOL | MDR  | P       | V     | ..    | KPT   | YDL  | PHLKA | HRQL | LFQ | DVY |      |      |     |     |
| A0A0B5D8Z7_7_19  | 1   | ..    | ..          | PDP                  | YLD        | PE   | TGLLRN | KVG   | GARTKAAL | DEAEG  | DL  | SFAR | S   | VOL | MDR  | P       | V     | ..    | KPT   | YDL  | PHLKA | HRQL | LFQ | DVY |      |      |     |     |
| UPI000491F215_3  | 1   | ..    | ..          | ESVDP                | YTD        | PE   | TGLLRN | KVG   | GARTKAAL | DEAEG  | DL  | SFAR | S   | VOL | MDR  | P       | V     | ..    | KPT   | YDL  | PHLKA | HRQL | LFQ | DVY |      |      |     |     |
| UPI0007DB6A85_7  | 1   | ..    | ..          | EVNDP                | YLD        | PE   | TGLLRN | KVG   | GARTKAAL | DEAEG  | DL  | SFAR | S   | VOL | MDR  | P       | V     | ..    | KPT   | YDL  | PHLKA | HRQL | LFQ | DVY |      |      |     |     |
| A0A0M712W8_7_19  | 1   | ..    | ..          | DGDP                 | YLD        | PE   | TGLLRN | KVG   | GARTKAAL | DEAEG  | DL  | SFAR | S   | VOL | MDR  | P       | V     | ..    | KPT   | YDL  | PHLKA | HRQL | LFQ | DVY |      |      |     |     |
| B21550_8_192     | 1   | ..    | ..          | GDP                  | YLD        | PE   | TGLLRN | KVG   | GARTKAAL | DEAEG  | DL  | SFAR | S   | VOL | MDR  | P       | V     | ..    | KPT   | YDL  | PHLKA | HRQL | LFQ | DVY |      |      |     |     |
| Q6QHR6_8_191     | 1   | ..    | ..          | GDP                  | YLD        | PE   | TGLLRN | KVG   | GARTKAAL | DEAEG  | DL  | SFAR | S   | VOL | MDR  | P       | V     | ..    | KPT   | YDL  | PHLKA | HRQL | LFQ | DVY |      |      |     |     |
| A0A1W6ZHH7_8_19  | 1   | ..    | ..          | GDP                  | YLD        | PE   | TGLLRN | KVG   | GARTKAAL | DEAEG  | DL  | SFAR | S   | VOL | MDR  | P       | V     | ..    | KPT   | YDL  | PHLKA | HRQL | LFQ | DVY |      |      |     |     |
| A0A157SRK7_6_18  | 1   | ..    | ..          | ADDA                 | YSD        | PE   | TGLLRN | KVG   | GARTKAAL | DEAEG  | DL  | SFAR | S   | VOL | MDR  | P       | V     | ..    | KPT   | YDL  | PHLKA | HRQL | LFQ | DVY |      |      |     |     |
| UPI0009FA7666_8  | 1   | ..    | ..          | AKDP                 | YVD        | PE   | TGLLRN | KVG   | GARTKAAL | DEAEG  | DL  | SFAR | S   | VOL | MDR  | P       | V     | ..    | KPT   | YDL  | PHLKA | HRQL | LFQ | DVY |      |      |     |     |
| A0A1M5YKV8_7_19  | 1   | ..    | ..          | DPSDP                | YID        | IS   | HQVLRN | RLG   | ISDQVEL  | LETEA  | F   | SAVR | L   | YEL | LAHN | P       | V     | ..    | RGR   | FDL  | NHLKQ | HRQL | LFQ | DVY |      |      |     |     |
| UPI000877CBA2_7  | 1   | ..    | ..          | SGNDP                | YTY        | PS   | DVLRN  | CL    | EIKDQD   | DLTVE  | SS  | AI   | RAE | LES | K    | P       | I     | ..    | AGS   | FDL  | KHLKQ | HRQL | LFQ | DVY |      |      |     |     |
| UPI0003685AEC_7  | 1   | ..    | ..          | KSNDP                | YID        | PS   | DVLRN  | CL    | EIKDQD   | DLTVE  | SS  | AI   | RAE | LES | K    | P       | I     | ..    | AGS   | FDL  | KHLKQ | HRQL | LFQ | DVY |      |      |     |     |
| UPI0007DC29D9_5  | 1   | ..    | ..          | SDSTDA               | YID        | PS   | DVLRN  | CL    | EIKDQD   | DLTVE  | SS  | AI   | RAE | LES | K    | P       | I     | ..    | AGS   | FDL  | KHLKQ | HRQL | LFQ | DVY |      |      |     |     |
| UPI000A3AEEA98_5 | 1   | ..    | ..          | SHHDE                | YID        | PS   | DVLRN  | CL    | EIKDQD   | DLTVE  | SS  | AI   | RAE | LES | K    | P       | I     | ..    | AGS   | FDL  | KHLKQ | HRQL | LFQ | DVY |      |      |     |     |
| UPI000A3BEF41_5  | 1   | ..    | ..          | SSHDE                | YID        | PS   | DVLRN  | CL    | EIKDQD   | DLTVE  | SS  | AI   | RAE | LES | K    | P       | I     | ..    | AGS   | FDL  | KHLKQ | HRQL | LFQ | DVY |      |      |     |     |
| COENL6_7_190     | 1   | ..    | ..          | ED                   | TI         | YM   | NDG    | VFRN  | KLA      | IQDPL  | KE  | LE   | TA  | VER | DI   | SA      | IS    | AQ    | NLLQ  | P    | I     | ..   | TGN | FDL | AHLQ | HRQL | LFQ | DVY |
| A0A1E9VG07_7_19  | 1   | ..    | ..          | ED                   | TI         | YM   | NDG    | VFRN  | KLA      | IQDPL  | KE  | LE   | TA  | VER | DI   | SA      | IS    | AQ    | NLLQ  | P    | I     | ..   | TGN | FDL | AHLQ | HRQL | LFQ | DVY |
| A0A1G0DLQ1_7_19  | 1   | ..    | ..          | SDS                  | YVY        | PD   | TGLLRN | KVG   | GARTKAAL | DEAEG  | DL  | SFAR | S   | VOL | MDR  | P       | V     | ..    | KPT   | YDL  | PHLKA | HRQL | LFQ | DVY |      |      |     |     |
| UPI0004093EC9_6  | 1   | ..    | ..          | GSDR                 | YVQ        | PD   | TGLLRN | KVG   | GARTKAAL | DEAEG  | DL  | SFAR | S   | VOL | MDR  | P       | V     | ..    | KPT   | YDL  | PHLKA | HRQL | LFQ | DVY |      |      |     |     |
| A0A191UFZ1_6_19  | 1   | ..    | ..          | ADDT                 | YCY        | PD   | TGLLRN | KVG   | GARTKAAL | DEAEG  | DL  | SFAR | S   | VOL | MDR  | P       | V     | ..    | KPT   | YDL  | PHLKA | HRQL | LFQ | DVY |      |      |     |     |
| W1UWB6_11_196    | 1   | ..    | ..          | TDSY                 | YCY        | PD   | TGLLRN | KVG   | GARTKAAL | DEAEG  | DL  | SFAR | S   | VOL | MDR  | P       | V     | ..    | KPT   | YDL  | PHLKA | HRQL | LFQ | DVY |      |      |     |     |
| ROBAU4_13_198    | 1   | ..    | ..          | VR                   | YCY        | PD   | TGLLRN | KVG   | GARTKAAL | DEAEG  | DL  | SFAR | S   | VOL | MDR  | P       | V     | ..    | KPT   | YDL  | PHLKA | HRQL | LFQ | DVY |      |      |     |     |
| UPI00073EA027_6  | 1   | ..    | ..          | DQS                  | YCY        | PD   | TGLLRN | KVG   | GARTKAAL | DEAEG  | DL  | SFAR | S   | VOL | MDR  | P       | V     | ..    | KPT   | YDL  | PHLKA | HRQL | LFQ | DVY |      |      |     |     |
| UPI0003FF5DF1_1  | 1   | ..    | ..          | SR                   | YCY        | PD   | TGLLRN | KVG   | GARTKAAL | DEAEG  | DL  | SFAR | S   | VOL | MDR  | P       | V     | ..    | KPT   | YDL  | PHLKA | HRQL | LFQ | DVY |      |      |     |     |
| UPI000BA184F1_1  | 1   | ..    | ..          | DSR                  | YCY        | PD   | TGLLRN | KVG   | GARTKAAL | DEAEG  | DL  | SFAR | S   | VOL | MDR  | P       | V     | ..    | KPT   | YDL  | PHLKA | HRQL | LFQ | DVY |      |      |     |     |
| UPI00098593C1_1  | 1   | ..    | ..          | DIK                  | YCY        | PD   | TGLLRN | KVG   | GARTKAAL | DEAEG  | DL  | SFAR | S   | VOL | MDR  | P       | V     | ..    | KPT   | YDL  | PHLKA | HRQL | LFQ | DVY |      |      |     |     |
| A0A1I0EBR7_5_18  | 1   | ..    | ..          | I                    | YCY        | PD   | TGLLRN | KVG   | GARTKAAL | DEAEG  | DL  | SFAR | S   | VOL | MDR  | P       | V     | ..    | KPT   | YDL  | PHLKA | HRQL | LFQ | DVY |      |      |     |     |
| A0A174L7Y0_5_18  | 1   | ..    | ..          | I                    | YCY        | PD   | TGLLRN | KVG   | GARTKAAL | DEAEG  | DL  | SFAR | S   | VOL | MDR  | P       | V     | ..    | KPT   | YDL  | PHLKA | HRQL | LFQ | DVY |      |      |     |     |
| A0A1Y3WG69_6_18  | 1   | ..    | ..          | TV                   | YCY        | PD   | TGLLRN | KVG   | GARTKAAL | DEAEG  | DL  | SFAR | S   | VOL | MDR  | P       | V     | ..    | KPT   | YDL  | PHLKA | HRQL | LFQ | DVY |      |      |     |     |
| A0A133ZQX8_8_19  | 1   | ..    | ..          | TV                   | YCY        | PD   | TGLLRN | KVG   | GARTKAAL | DEAEG  | DL  | SFAR | S   | VOL | MDR  | P       | V     | ..    | KPT   | YDL  | PHLKA | HRQL | LFQ | DVY |      |      |     |     |
| UPI0004E2644B_3  | 1   | ..    | ..          | DTQDP                | YCY        | PD   | TGLLRN | KVG   | GARTKAAL | DEAEG  | DL  | SFAR | S   | VOL | MDR  | P       | V     | ..    | KPT   | YDL  | PHLKA | HRQL | LFQ | DVY |      |      |     |     |
| UPI0009B101DD_3  | 1   | ..    | ..          | NDP                  | YVY        | PD   | TGLLRN | KVG   | GARTKAAL | DEAEG  | DL  | SFAR | S   | VOL | MDR  | P       | V     | ..    | KPT   | YDL  | PHLKA | HRQL | LFQ | DVY |      |      |     |     |
| I4AC02_5_187     | 1   | ..    | ..          | E                    | YCY        | PD   | TGLLRN | KVG   | GARTKAAL | DEAEG  | DL  | SFAR |     |     |      |         |       |       |       |      |       |      |     |     |      |      |     |     |

|                 |   |                     |   |   |   |   |   |   |   |   |   |   |   |   |   |   |   |   |   |   |   |     |   |   |   |   |   |   |   |   |   |   |   |   |   |   |   |   |   |   |   |   |   |   |   |   |   |   |   |   |   |   |   |   |   |   |   |   |   |   |   |   |   |   |   |   |   |   |   |
|-----------------|---|---------------------|---|---|---|---|---|---|---|---|---|---|---|---|---|---|---|---|---|---|---|-----|---|---|---|---|---|---|---|---|---|---|---|---|---|---|---|---|---|---|---|---|---|---|---|---|---|---|---|---|---|---|---|---|---|---|---|---|---|---|---|---|---|---|---|---|---|---|---|
| A0A1X1F340_8_19 | 1 | .....ARDP.....      | Y | L | W | Q | N | D | D | V | L | K | N | R | L | D | I | H | D | A | A | Q   | L | R | K | A | E | L | A | F | S | A | A | R | L | A | T | L | E | L | G | . | P | A | . | . | . | T | . | . | . | I | G | I | P | F | L | R | H | I | H | R | T | L | F | Q | D | V | Y |
| A0A0A1B9S6_7_19 | 1 | .....NGRDP.....     | Y | Y | W | Q | N | D | D | V | L | K | N | R | L | D | I | H | D | A | A | Q   | L | Q | K | A | E | V | A | F | T | S | L | R | A | A | T | L | E | L | G | . | P | R | . | . | . | N | . | . | . | L | G | F | P | Y | L | C | A | I | H | R | T | L | F | Q | D | L | Y |
| A0A1Q6RXD8_9_18 | 1 | .....QA.....        | N | C | Y | P | G | T | T | V | L | N | K | L | H | I | H | D | E | A | A | L   | Q | E | A | E | A | L | A | T | Y | V | N | A | S | K | L | E | Q | C | . | P | L | . | . | . | E | G | V | F | D | F | A | H | Y | K | A | I | H | O | F | L | F | S | D | L | Y |   |   |
| J0ZFI4_13_219   | 1 | .....VPSPEH.....    | Y | M | Y | P | K | S | K | T | L | K | N | K | Y | G | I | K | D | L | D | T   | F | T | A | R | C | A | H | S | A | K | E | I | N | L | R | E | E | . | A | L | . | . | . | P | E | N | F | N | S | A | Y | L | C | S | I | H | O | R | L | F | R | N | T | F |   |   |   |
| UPI0002FBCDAC_1 | 1 | .....PYH.....       | Y | V | Y | P | N | T | T | T | L | K | N | K | Y | G | I | K | D | L | K | S   | F | L | D | K | C | S | H | D | T | A | E | A | M | I | N | L | R | E | A | . | P | L | . | . | . | P | E | K | F | D | S | S | Y | L | C | S | I | H | O | L | F | K | N | T | F |   |   |
| J0R9F3_17_222   | 1 | .....SPEH.....      | Y | M | Y | P | K | S | K | T | L | K | N | K | Y | G | I | K | D | L | A | F   | T | A | R | C | A | H | S | A | K | A | M | I | N | L | R | E | E | . | P | L | . | . | . | P | E | K | F | D | S | S | Y | L | Q | Y | I | H | K | N | L | F | E | N | T | F |   |   |   |
| J0PVQ4_15_223   | 1 | .....SPHN.....      | Y | T | Y | P | N | S | N | T | L | K | N | K | Y | G | I | K | N | L | K | L   | F | L | E | K | C | S | H | D | T | T | K | A | M | I | N | L | R | T | E | . | P | L | . | . | . | P | E | Q | F | D | A | S | Y | L | C | H | I | H | K | S | L | F | N | T | F |   |   |
| J0YV99_16_222   | 1 | .....PHN.....       | Y | T | Y | P | K | T | T | T | L | K | N | K | Y | G | T | K | N | L | K | T   | F | L | D | K | C | S | H | D | T | T | K | A | M | I | N | L | R | E | E | . | P | L | . | . | . | P | E | Q | F | D | S | S | Y | L | C | Y | I | H | K | R | L | F | N | T | F |   |   |
| J1IT50_14_223   | 1 | .....TSPHH.....     | Y | V | Y | P | N | T | T | T | L | K | N | K | Y | G | I | K | D | F | K | A   | F | L | E | K | T | S | H | D | S | A | K | A | M | V | N | L | R | E | S | . | P | L | . | . | . | P | E | Q | F | N | S | S | Y | L | C | H | I | H | S | Q | L | F | K | D | T | F |   |
| J0ZAV5_12_223   | 1 | .....QTSPHH.....    | Y | V | Y | P | N | T | T | T | L | K | N | K | Y | G | I | K | D | L | K | S   | F | L | E | K | C | S | H | D | T | A | Q | A | M | V | N | L | R | E | A | . | P | L | . | . | . | P | E | Q | F | N | S | S | Y | L | C | S | I | H | Y | D | L | F | K | N | T | F |   |
| UPI0002ED3042_1 | 1 | .....TTSPPH.....    | Y | V | Y | P | N | T | R | T | L | K | N | K | Y | G | T | K | N | L | K | S   | F | L | E | K | C | S | H | D | T | S | K | A | I | V | N | L | R | E | A | . | P | L | . | . | . | P | E | Q | F | D | S | S | Y | L | C | H | I | H | Y | L | F | K | N | T | F |   |   |
| Q6G2A9_15_223   | 1 | .....SPHH.....      | Y | V | Y | P | N | T | T | T | L | K | N | K | Y | G | I | K | N | L | N | A   | F | L | E | K | C | S | H | D | T | A | K | A | M | I | N | L | R | E | E | . | S | L | . | . | . | P | E | Y | F | D | T | A | Y | L | C | H | I | H | Q | L | F | K | N | T | F |   |   |
| A0A067W308_15_2 | 1 | .....SPHH.....      | Y | V | Y | P | K | T | T | T | L | K | N | K | Y | R | I | K | N | L | N | T   | F | L | E | K | C | S | H | D | T | A | K | A | M | V | N | L | R | E | D | . | P | L | . | . | . | P | E | Y | F | D | T | T | Y | L | C | H | I | H | Q | L | F | K | N | T | F |   |   |
| J0R905_14_223   | 1 | .....PSPHN.....     | Y | L | Y | P | K | T | V | T | L | K | N | K | Y | G | T | K | D | L | D | T   | F | L | K | K | C | S | H | D | T | A | K | A | M | I | N | L | R | E | E | . | S | L | . | . | . | P | E | K | F | D | S | A | Y | L | C | H | I | H | K | L | F | N | T | F |   |   |   |
| N6VKZ4_14_221   | 1 | .....PHH.....       | Y | T | Y | P | G | S | V | T | L | K | N | K | Y | G | T | K | N | L | K | S   | F | L | E | K | C | A | Q | D | S | A | K | A | M | V | N | L | R | E | E | . | P | L | . | . | . | P | E | N | F | D | S | S | Y | L | K | Y | I | H | K | R | L | F | E | N | T | F |   |
| J1IX26_18_225   | 1 | .....PRH.....       | Y | T | Y | P | N | S | V | T | L | K | N | K | Y | G | I | K | D | L | K | T   | L | L | E | K | C | S | H | D | S | A | K | A | M | I | N | L | R | L | E | . | S | A | . | . | . | P | E | R | F | D | S | S | Y | L | K | Y | I | H | F | H | L | F | K | N | T | F |   |
| UPI0002E2E5F6_1 | 1 | .....NTQTVSSH.....  | Y | V | Y | P | K | T | K | T | L | K | N | K | Y | G | I | K | D | L | D | T   | F | L | K | R | C | S | H | D | T | D | E | A | M | N | L | R | G | E | . | P | L | . | . | . | P | E | F | F | I | D | Y | L | R | H | I | H | E | L | F | K | N | T | F |   |   |   |   |
| J0ZTN1_479_689  | 1 | .....KDHTASHN.....  | F | F | Y | P | N | S | I | T | L | K | N | K | Y | A | I | K | D | S | E | L   | K | E | Q | C | A | H | D | T | A | K | A | I | I | H | L | R | Q | E | . | E | P | . | . | . | P | Q | R | L | S | S | T | Y | L | Q | Y | I | H | T | L | F | K | K | T | F |   |   |   |
| J0QQF2_488_699  | 1 | .....EGNNTKHRN..... | F | F | Y | P | N | S | I | T | L | K | N | K | Y | G | I | Q | N | S | E | K   | L | K | V | Q | C | A | H | D | T | A | K | A | L | I | H | L | R | R | E | . | A | P | . | . | . | P | Q | N | L | T | S | A | Y | L | Q | Y | I | H | T | L | F | K | N | T | F |   |   |
| J1JNJ1_92_301   | 1 | .....KKISPRH.....   | F | M | Y | P | N | S | V | T | L | K | N | K | Y | G | I | T | D | Y | G | K   | F | Q | M | Q | C | A | H | D | S | A | K | A | I | N | L | R | Q | E | . | A | P | . | . | . | P | Q | K | L | T | S | A | Y | L | L | Y | I | H | T | L | F | K | N | T | F |   |   |   |
| J0ZFH4_482_684  | 1 | .....N.....         | F | Y | Y | P | N | S | V | T | L | K | N | K | Y | G | I | K | D | Y | R | L   | Q | V | C | A | H | D | S | A | R | A | M | I | N | L | R | Q | E | . | A | T | . | . | . | P | Q | R | L | T | S | A | Y | L | L | Y | I | H | T | L | F | K | N | T | F |   |   |   |   |
| J0ZFH4_23_234   | 1 | .....NTHMLEQN.....  | F | Y | Y | P | D | S | K | T | L | K | N | K | Y | G | I | M | D | R | T | A   | L | K | E | Q | C | A | H | D | A | S | K | E | M | I | N | L | R | Q | E | . | P | L | . | . | . | P | E | K | I | D | S | S | Y | L | K | Y | I | H | Q | R | L | F | Q | H | T | F |   |
| E6YRX0_21_227   | 1 | .....SYY.....       | Y | T | Y | P | D | T | V | V | L | K | N | K | Y | G | I | T | D | L | Y | E   | L | V | Q | R | C | A | H | D | T | A | K | E | A | V | N | L | L | A | E | . | P | D | . | . | . | P | E | R | F | D | T | S | Y | L | K | Y | I | H | G | R | L | F | Q | D | V | F |   |
| E6YIF3_22_227   | 1 | .....YN.....        | Y | V | Y | P | N | S | N | V | L | K | N | K | Y | G | I | T | D | F | K | S   | L | E | S | R | C | A | H | D | S | A | K | A | V | N | L | M | K | E | . | P | C | . | . | . | P | E | R | F | D | S | T | Y | L | K | Y | I | H | K | R | L | F | E | N | T | F |   |   |
| E6YFW2_21_229   | 1 | .....PSH.....       | Y | N | Y | P | N | S | L | T | L | K | N | K | Y | G | I | T | N | H | K | D   | F | T | N | K | C | A | H | D | S | A | K | A | I | N | L | R | Q | E | . | E | P | . | . | . | P | K | K | F | D | S | S | Y | L | K | Y | I | H | K | Q | L | F | K | E | T | F |   |   |
| A0A0M3T2N3_4_21 | 1 | .....INKQFQN.....   | Y | S | Y | P | D | T | S | V | L | K | N | K | Y | G | A | V | D | F | L | Q   | F | E | E | L | C | A | H | G | V | A | K | A | M | I | N | L | Q | N | E | . | P | L | . | . | . | P | E | K | F | D | S | S | Y | L | K | Y | I | H | K | R | L | F | G | N | T | F |   |
| J1IY69_4_209    | 1 | .....QN.....        | Y | L | Y | K | N | S | N | T | L | K | N | K | Y | G | I | K | D | P | K | K   | L | Y | E | R | C | A | H | D | A | A | K | E | A | I | N | F | R | Y | E | . | P | L | . | . | . | P | Q | R | F | D | A | A | Y | L | K | T | I | H | W | L | F | H | K | S | F |   |   |
| C6AES7_4_209    | 1 | .....QN.....        | Y | L | Y | K | G | T | L | T | L | K | N | K | Y | G | I | K | D | P | K | K   | L | Y | E | R | C | A | H | D | T | A | R | E | A | V | N | F | R | H | E | . | P | L | . | . | . | P | Q | K | F | D | S | T | Y | L | K | L | I | H | W | S | L | F | H | K | T | F |   |
| A0A0M3T2K6_22_2 | 1 | .....TAYN.....      | Y | Y | P | N | T | L | L | I | N | E | H | G | I | K | D | R | V | H | L | E</ |   |   |   |   |   |   |   |   |   |   |   |   |   |   |   |   |   |   |   |   |   |   |   |   |   |   |   |   |   |   |   |   |   |   |   |   |   |   |   |   |   |   |   |   |   |   |   |

3SHG:A|PDBID|CH

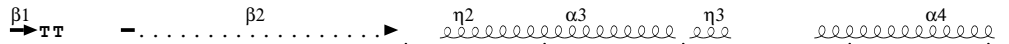

Table with 3 columns: Accession ID, Residue Number, and Amino Acid Sequence. The table lists 1000 entries, each starting with a residue number (e.g., 73, 81, 79) and a three-letter amino acid code (e.g., EWA, VWA, VWA). The sequences are aligned across the rows, with some residues highlighted in yellow. The table ends with the accession ID A0A1V9DP73\_8\_19 at the bottom.

```

A0A1X1F340_8_19 65 AWAGELRTIDIWRDD...T...PFCHFEYIEKENTLMDALEEEEGL.RNL.EEADFARIAHYC
A0A0A1B9S6_7_19 66 EWAGEIREIDLYLGD...T...PFCHFEYIEKENALMDALEEENGL.ADL.PFEQFVARIAHYC
A0A1Q6RXD8_9_18 65 DWAGQIRTVNISKKG...T...DFCPAGEIEPOAKLIFDRLEEQNYF.KGL.PHDAFVEEITDFYC
J0ZFI4_13_219 69 EWAGCTRNVPETFADG...TTAVAPVMKKI...THFAVGSEVEEGLNKLDQTLAAKNNL.QGL.TREEFTHEAAEIFA
UPI0002FBCDAC_1 66 EWAGQTRNVPETFLDG...TTAIAPVMKKI...TSFAIGNELQEGLQKLDQTLSEKNNL.RDL.SCKEFAHEAAKIFA
J0R9F3_17_222 67 EWAGQTRNVPETFADG...STAVAPIMKKI...TNFAVGSELEKCLNKLDQTLTKNNL.QGL.SCKEFAHEAAEIFA
J0PVQ4_15_223 67 EWAGQLRNIPETFEDG...TIAVMPEMKRTGW...ESAFAIGDKIQEGLQRLDQTLREKNNL.QGL.TREDFISETMEMFN
J0YV99_16_222 66 EWAGQLRNIPETFEDG...TTAAMPEMKRTGW...ENAFAIGYEIQEGLQRLDQALAEKNNL.QGL.TREEFISEAMEMFN
J1IT50_14_223 68 EWAGHFRHVPETFEDG...TTAAMPEMKRTGW...ENAFAIGDEIQEGLQKLDKTLVEKNNL.RGL.TREEFNFQAISLFN
J0ZAV5_12_223 70 EWAGHLRHLPETFSDG...TTASMPEMKRTGW...DNPFAIGDEIQEGLQKLDQTLSQKNNL.QGL.TREEFNTEAMNLFN
UPI0002ED3042_1 69 EWAGHPRHIPETFEDG...TTAVMPEMKRTGW...ENAFAIGDEIQEGLQKLDQKLAEKNNL.QDL.TREEFNSEAIDLFN
Q6G2A9_15_223 67 EWAGYLRHIPETFADG...TTAAMPEMKRTGW...KNAFAIGDEIQEGLQRLDQTLAEKNNL.QGL.TREEFNSEAIELFN
A0A067W308_15_2 67 EWAGHLRHIPETFEDG...TTAAMPEMKRTGW...KNAFAIGDEIQEGLQRLDRTLAEKNNL.QSL.TREEFNSEAMELFN
J0R905_14_223 68 EWAGLTRNIPVTFSDG...TTAVMPEMKRTGW...ENAFAIGDEIQEGLQQLDQMLAEKNNL.QGL.SREEFNSEAINLFN
N6VKZ4_14_221 66 EWAGHTRDEAFTFSDG...TTAAMPEMKRTGW...ENPFAIGDEIQESTLQKLDQTLFEKNNL.QDL.TREEFISEAMEMFN
J1IX26_18_225 66 EWAGHTRDEVEFKFSDG...TTATMPEMQRTGW...TLPFAIGDQIQEGLQKLDQTLVEKNNL.KGL.TREEFTHEAVNLFN
UPI0002E2E5F6_1 72 EWAGQLRHTPETFADG...TTAAMPEMKRTGW...NNPFAIGNEVQEGLQRLEQRLAEKNNL.RGL.TREEFNSQALEIFN
J0ZTN1_479_689 71 EWAGQTRDKPETFEDG...SVAYMLEMKKA...GVHFASKKQIQEGLKNLDKTLAETNSL.KGL.TRETFVEHAAEMLI
J0QQF2_488_699 72 EWAGHTREKPETFEDG...TVASMPNMKKD...GISFASEKQIPKSLENLDKILAETNNL.KGL.TRETFVEQATEMMI
J1JNJ1_92_301 70 EWAGKTREKPETFKDG...TVACMSEMKKA...NISFASGNKIQEGLENLDRTLAEKNYL.KGL.TREAFVENAAEIMI
J0ZFH4_482_684 64 EWAGHTRDKPESFADG...TTASAPKMKKA...NISFASGKKVQEGLDDLDRTLNEKNNL.KGL.TRKAFVKNAAEMMI
J0ZFH4_23_234 71 EWAGYTRDQLETFADG...TTASMPAMQKEDA...EVPFAIGPQIQKELENLDRILTEKNYL.KGL.SRETFVEQAAELFV
E6YRX0_21_227 66 EWAGCTRDVPETFSDG...TTATALGMSKSDS...DVKFAAGREIGESLELFDRVLAQKNNL.KGL.SREEFVPEAAKLFA
E6YIF3_22_227 65 EWAGHTRDVPEAFSDG...TSAVVLKMKKSNS...NMYFAVGKKIQQNLAKIDRILVEKNNL.QGL.SREEFVYHAAELFA
E6YFW2_21_229 66 EWAGHTRDLPETFADG...TVGVMPEMIRSNWRTEQPIIFATGNKVQDGLKNIDKMLIEKNNL.QGL.SHKEFIENIAEIFA
A0A0M3T2N3_4_21 70 EWAGHTRDLPEKFSDG...SVAVAPAMHKADS...PLAFAINDDIQEGLQVVDYAINERNNL.RGL.SHKEFVEEATEIFT
J1Y69_4_209 65 AWAGQTRDKPETFEDG...STARMSAMRPKGF...EVPFAIGPQIQKELKLEQMLSAKNNL.RGL.SRQEFATSAAEIFI
C6AES7_4_209 65 EWAGKTRDVSETFEDG...TSAHMPAMRPKGY...EVPFAVGPQIQKKLKLEKTLNEKNNL.KGL.SRQEFAENAAEVFM
A0A0M3T2K6_22_2 67 AWAGQTRDLPEIFPDG...RAAHIPTMQKSDP...PVIFATGSEIQEVLKRLDQELEKRNYL.QGL.SREEFAQSAATLFS
A0A1S6XGW8_13_2 71 EWAGHTRDLPETFEDG...TIANISKMLIPES...TAFFQDSNKIKKQLOKFDNILSQKKEL.QGL.SREEFIDEAVKLFS
A0A1V0PNG5_8_21 66 EWAGCTRDMLEKEQDG...TSALMSKMGLN.P...DFSFVDGEKIQEQLSEGEIIAGKNNL.KGL.SREEFVREVTQPFA
consensus>70 ewaG...R.v...k...f...i...l...l...l...a...

```

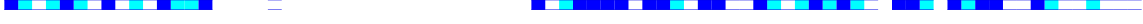

3SHG:A|PDBID|CH

|                   | α5                  | β3       | FT     | α6      | α7          | β4                    |                       |            |
|-------------------|---------------------|----------|--------|---------|-------------|-----------------------|-----------------------|------------|
| 3SHG:A PDBID CH   | ELNVALHPFFRENGRTR   | REFEIQWQ | LAREAG | YHIDWDR | VE..RQEMTR  | ASIESY.YG...NSDLSMSAT | IRRNLTEFT...          |            |
| rv3641c           | YVNFYAHPPFFRENGRSTR | REFFFDLL | LLSERG | SGLDW   | GKTD..LEELH | GCAC                  | HVARANS...DLTGLVAMFKG | ILDAEPTYDF |
| A0A0451LG3_3_21   | YVNFYAHPPFFRENGRSTR | REFFFDLL | LLSERG | SGLDW   | GKTD..LEELH | GCAC                  | HVARANS...DLTGLVAMFKG | ILDAEPTYDF |
| A0A1X0FFM8_3_21   | YVNFYAHPPFFRENGRSTR | REFFFDLL | LLSERG | SGLDW   | GKTD..LEELH | GCAC                  | HVARANS...DLTGLVAMFKG | ILDAEPTYDF |
| UPI00061B5852_4   | YVNFYAHPPFFRENGRSTR | REFFFDLL | LLSERG | SGLDW   | GKTD..LEELH | GCAC                  | HVARANS...DLTGLVAMFKG | ILDAEPTYDF |
| G41GD3_3_211      | YVNFYAHPPFFRENGRSTR | REFFFDLL | LLSERG | SGLDW   | GKTD..LEELH | GCAC                  | HVARANS...DLTGLVAMFKG | ILDAEPTYDF |
| UPI000641ED08_3   | YVNFYAHPPFFRENGRSTR | REFFFDLL | LLSERG | SGLDW   | GKTD..LEELH | GCAC                  | HVARANS...DLTGLVAMFKG | ILDAEPTYDF |
| A1TB85_3_210      | YVNFYAHPPFFRENGRSTR | REFFFDLL | LLSERG | SGLDW   | GKTD..LEELH | GCAC                  | HVARANS...DLTGLVAMFKG | ILDAEPTYDF |
| UPI000829D5C8_3   | YVNFYAHPPFFRENGRSTR | REFFFDLL | LLSERG | SGLDW   | GKTD..LEELH | GCAC                  | HVARANS...DLTGLVAMFKG | ILDAEPTYDF |
| A0A1E8Q945_3_20   | YVNFYAHPPFFRENGRSTR | REFFFDLL | LLSERG | SGLDW   | GKTD..LEELH | GCAC                  | HVARANS...DLTGLVAMFKG | ILDAEPTYDF |
| UPI0008DE55BD_3   | YVNFYAHPPFFRENGRSTR | REFFFDLL | LLSERG | SGLDW   | GKTD..LEELH | GCAC                  | HVARANS...DLTGLVAMFKG | ILDAEPTYDF |
| UPI000829D926_3   | YVNFYAHPPFFRENGRSTR | REFFFDLL | LLSERG | SGLDW   | GKTD..LEELH | GCAC                  | HVARANS...DLTGLVAMFKG | ILDAEPTYDF |
| A0A0E4AF03_3_21   | YVNFYAHPPFFRENGRSTR | REFFFDLL | LLSERG | SGLDW   | GKTD..LEELH | GCAC                  | HVARANS...DLTGLVAMFKG | ILDAEPTYDF |
| UPI000837787E_2   | YVNFYAHPPFFRENGRSTR | REFFFDLL | LLSERG | SGLDW   | GKTD..LEELH | GCAC                  | HVARANS...DLTGLVAMFKG | ILDAEPTYDF |
| A1UQ28_16_224     | YVNFYAHPPFFRENGRSTR | REFFFDLL | LLSERG | SGLDW   | GKTD..LEELH | GCAC                  | HVARANS...DLTGLVAMFKG | ILDAEPTYDF |
| UPI0009A7EFC8_6   | YVNFYAHPPFFRENGRSTR | REFFFDLL | LLSERG | SGLDW   | GKTD..LEELH | GCAC                  | HVARANS...DLTGLVAMFKG | ILDAEPTYDF |
| A0A1N0GFPW2_4_21  | YVNFYAHPPFFRENGRSTR | REFFFDLL | LLSERG | SGLDW   | GKTD..LEELH | GCAC                  | HVARANS...DLTGLVAMFKG | ILDAEPTYDF |
| UPI00029A95B3_6   | YVNFYAHPPFFRENGRSTR | REFFFDLL | LLSERG | SGLDW   | GKTD..LEELH | GCAC                  | HVARANS...DLTGLVAMFKG | ILDAEPTYDF |
| H5TVL8_4_207      | YVNFYAHPPFFRENGRSTR | REFFFDLL | LLSERG | SGLDW   | GKTD..LEELH | GCAC                  | HVARANS...DLTGLVAMFKG | ILDAEPTYDF |
| A0A1I0SZV9_4_20   | YVNFYAHPPFFRENGRSTR | REFFFDLL | LLSERG | SGLDW   | GKTD..LEELH | GCAC                  | HVARANS...DLTGLVAMFKG | ILDAEPTYDF |
| A0A135GYB9_6_20   | YVNFYAHPPFFRENGRSTR | REFFFDLL | LLSERG | SGLDW   | GKTD..LEELH | GCAC                  | HVARANS...DLTGLVAMFKG | ILDAEPTYDF |
| UPI0009DBFCE3_3   | YVNFYAHPPFFRENGRSTR | REFFFDLL | LLSERG | SGLDW   | GKTD..LEELH | GCAC                  | HVARANS...DLTGLVAMFKG | ILDAEPTYDF |
| A0A1H9QJF1_7_19   | YVNFYAHPPFFRENGRSTR | REFFFDLL | LLSERG | SGLDW   | GKTD..LEELH | GCAC                  | HVARANS...DLTGLVAMFKG | ILDAEPTYDF |
| A0A1Q02TFC0_7_19  | YVNFYAHPPFFRENGRSTR | REFFFDLL | LLSERG | SGLDW   | GKTD..LEELH | GCAC                  | HVARANS...DLTGLVAMFKG | ILDAEPTYDF |
| UPI000405E865_7   | YVNFYAHPPFFRENGRSTR | REFFFDLL | LLSERG | SGLDW   | GKTD..LEELH | GCAC                  | HVARANS...DLTGLVAMFKG | ILDAEPTYDF |
| U2QDR9_5_201      | YVNFYAHPPFFRENGRSTR | REFFFDLL | LLSERG | SGLDW   | GKTD..LEELH | GCAC                  | HVARANS...DLTGLVAMFKG | ILDAEPTYDF |
| UPI000BBB1953_5   | YVNFYAHPPFFRENGRSTR | REFFFDLL | LLSERG | SGLDW   | GKTD..LEELH | GCAC                  | HVARANS...DLTGLVAMFKG | ILDAEPTYDF |
| A0A0B5D8Z7_7_19   | YVNFYAHPPFFRENGRSTR | REFFFDLL | LLSERG | SGLDW   | GKTD..LEELH | GCAC                  | HVARANS...DLTGLVAMFKG | ILDAEPTYDF |
| UPI000491F215_3   | YVNFYAHPPFFRENGRSTR | REFFFDLL | LLSERG | SGLDW   | GKTD..LEELH | GCAC                  | HVARANS...DLTGLVAMFKG | ILDAEPTYDF |
| UPI0007DB6A85_7   | YVNFYAHPPFFRENGRSTR | REFFFDLL | LLSERG | SGLDW   | GKTD..LEELH | GCAC                  | HVARANS...DLTGLVAMFKG | ILDAEPTYDF |
| A0A0M7I2W8_7_19   | YVNFYAHPPFFRENGRSTR | REFFFDLL | LLSERG | SGLDW   | GKTD..LEELH | GCAC                  | HVARANS...DLTGLVAMFKG | ILDAEPTYDF |
| B2I550_8_192      | YVNFYAHPPFFRENGRSTR | REFFFDLL | LLSERG | SGLDW   | GKTD..LEELH | GCAC                  | HVARANS...DLTGLVAMFKG | ILDAEPTYDF |
| Q6QHR6_8_191      | YVNFYAHPPFFRENGRSTR | REFFFDLL | LLSERG | SGLDW   | GKTD..LEELH | GCAC                  | HVARANS...DLTGLVAMFKG | ILDAEPTYDF |
| A0A1W6ZHH7_8_19   | YVNFYAHPPFFRENGRSTR | REFFFDLL | LLSERG | SGLDW   | GKTD..LEELH | GCAC                  | HVARANS...DLTGLVAMFKG | ILDAEPTYDF |
| A0A157SRK7_6_18   | YVNFYAHPPFFRENGRSTR | REFFFDLL | LLSERG | SGLDW   | GKTD..LEELH | GCAC                  | HVARANS...DLTGLVAMFKG | ILDAEPTYDF |
| UPI0009FA7666_8   | YVNFYAHPPFFRENGRSTR | REFFFDLL | LLSERG | SGLDW   | GKTD..LEELH | GCAC                  | HVARANS...DLTGLVAMFKG | ILDAEPTYDF |
| A0A1M5YK8_7_19    | YVNFYAHPPFFRENGRSTR | REFFFDLL | LLSERG | SGLDW   | GKTD..LEELH | GCAC                  | HVARANS...DLTGLVAMFKG | ILDAEPTYDF |
| UPI000877CBA2_7   | YVNFYAHPPFFRENGRSTR | REFFFDLL | LLSERG | SGLDW   | GKTD..LEELH | GCAC                  | HVARANS...DLTGLVAMFKG | ILDAEPTYDF |
| UPI0003685AEC_7   | YVNFYAHPPFFRENGRSTR | REFFFDLL | LLSERG | SGLDW   | GKTD..LEELH | GCAC                  | HVARANS...DLTGLVAMFKG | ILDAEPTYDF |
| UPI0007DC29D9_5   | YVNFYAHPPFFRENGRSTR | REFFFDLL | LLSERG | SGLDW   | GKTD..LEELH | GCAC                  | HVARANS...DLTGLVAMFKG | ILDAEPTYDF |
| UPI0000A3AE98_5   | YVNFYAHPPFFRENGRSTR | REFFFDLL | LLSERG | SGLDW   | GKTD..LEELH | GCAC                  | HVARANS...DLTGLVAMFKG | ILDAEPTYDF |
| UPI0000A3BEF41_5  | YVNFYAHPPFFRENGRSTR | REFFFDLL | LLSERG | SGLDW   | GKTD..LEELH | GCAC                  | HVARANS...DLTGLVAMFKG | ILDAEPTYDF |
| COENL6_7_190      | YVNFYAHPPFFRENGRSTR | REFFFDLL | LLSERG | SGLDW   | GKTD..LEELH | GCAC                  | HVARANS...DLTGLVAMFKG | ILDAEPTYDF |
| A0A1E9VG07_7_19   | YVNFYAHPPFFRENGRSTR | REFFFDLL | LLSERG | SGLDW   | GKTD..LEELH | GCAC                  | HVARANS...DLTGLVAMFKG | ILDAEPTYDF |
| A0A1G0DLQ1_7_19   | YVNFYAHPPFFRENGRSTR | REFFFDLL | LLSERG | SGLDW   | GKTD..LEELH | GCAC                  | HVARANS...DLTGLVAMFKG | ILDAEPTYDF |
| UPI0004093EC9_6   | YVNFYAHPPFFRENGRSTR | REFFFDLL | LLSERG | SGLDW   | GKTD..LEELH | GCAC                  | HVARANS...DLTGLVAMFKG | ILDAEPTYDF |
| A0A191UFU1_6_19   | YVNFYAHPPFFRENGRSTR | REFFFDLL | LLSERG | SGLDW   | GKTD..LEELH | GCAC                  | HVARANS...DLTGLVAMFKG | ILDAEPTYDF |
| W1UWB6_11_196     | YVNFYAHPPFFRENGRSTR | REFFFDLL | LLSERG | SGLDW   | GKTD..LEELH | GCAC                  | HVARANS...DLTGLVAMFKG | ILDAEPTYDF |
| ROBU44_13_198     | YVNFYAHPPFFRENGRSTR | REFFFDLL | LLSERG | SGLDW   | GKTD..LEELH | GCAC                  | HVARANS...DLTGLVAMFKG | ILDAEPTYDF |
| UPI00073EA027_6   | YVNFYAHPPFFRENGRSTR | REFFFDLL | LLSERG | SGLDW   | GKTD..LEELH | GCAC                  | HVARANS...DLTGLVAMFKG | ILDAEPTYDF |
| UPI0003FF5DF1_1   | YVNFYAHPPFFRENGRSTR | REFFFDLL | LLSERG | SGLDW   | GKTD..LEELH | GCAC                  | HVARANS...DLTGLVAMFKG | ILDAEPTYDF |
| UPI000BA184F1_1   | YVNFYAHPPFFRENGRSTR | REFFFDLL | LLSERG | SGLDW   | GKTD..LEELH | GCAC                  | HVARANS...DLTGLVAMFKG | ILDAEPTYDF |
| UPI00098593C1_1   | YVNFYAHPPFFRENGRSTR | REFFFDLL | LLSERG | SGLDW   | GKTD..LEELH | GCAC                  | HVARANS...DLTGLVAMFKG | ILDAEPTYDF |
| A0A1I0EBR7_5_18   | YVNFYAHPPFFRENGRSTR | REFFFDLL | LLSERG | SGLDW   | GKTD..LEELH | GCAC                  | HVARANS...DLTGLVAMFKG | ILDAEPTYDF |
| A0A174L7Y0_5_18   | YVNFYAHPPFFRENGRSTR | REFFFDLL | LLSERG | SGLDW   | GKTD..LEELH | GCAC                  | HVARANS...DLTGLVAMFKG | ILDAEPTYDF |
| A0A1Y3WG69_6_18   | YVNFYAHPPFFRENGRSTR | REFFFDLL | LLSERG | SGLDW   | GKTD..LEELH | GCAC                  | HVARANS...DLTGLVAMFKG | ILDAEPTYDF |
| A0A133ZXQ8_8_19   | YVNFYAHPPFFRENGRSTR | REFFFDLL | LLSERG | SGLDW   | GKTD..LEELH | GCAC                  | HVARANS...DLTGLVAMFKG | ILDAEPTYDF |
| UPI0004E2644B_3   | YVNFYAHPPFFRENGRSTR | REFFFDLL | LLSERG | SGLDW   | GKTD..LEELH | GCAC                  | HVARANS...DLTGLVAMFKG | ILDAEPTYDF |
| UPI0009B101DD_3   | YVNFYAHPPFFRENGRSTR | REFFFDLL | LLSERG | SGLDW   | GKTD..LEELH | GCAC                  | HVARANS...DLTGLVAMFKG | ILDAEPTYDF |
| I4AC02_5_187      | YVNFYAHPPFFRENGRSTR | REFFFDLL | LLSERG | SGLDW   | GKTD..LEELH | GCAC                  | HVARANS...DLTGLVAMFKG | ILDAEPTYDF |
| R6X2K0_9_194      | YVNFYAHPPFFRENGRSTR | REFFFDLL | LLSERG | SGLDW   | GKTD..LEELH | GCAC                  | HVARANS...DLTGLVAMFKG | ILDAEPTYDF |
| R8JT24_8_198      | YVNFYAHPPFFRENGRSTR | REFFFDLL | LLSERG | SGLDW   | GKTD..LEELH | GCAC                  | HVARANS...DLTGLVAMFKG | ILDAEPTYDF |
| UPI000BFCEA0F_8   | YVNFYAHPPFFRENGRSTR | REFFFDLL | LLSERG | SGLDW   | GKTD..LEELH | GCAC                  | HVARANS...DLTGLVAMFKG | ILDAEPTYDF |
| UPI00053582FE_8   | YVNFYAHPPFFRENGRSTR | REFFFDLL | LLSERG | SGLDW   | GKTD..LEELH | GCAC                  | HVARANS...DLTGLVAMFKG | ILDAEPTYDF |
| A0A1Y5YTF8_6_19   | YVNFYAHPPFFRENGRSTR | REFFFDLL | LLSERG | SGLDW   | GKTD..LEELH | GCAC                  | HVARANS...DLTGLVAMFKG | ILDAEPTYDF |
| UPI0005704481_5   | YVNFYAHPPFFRENGRSTR | REFFFDLL | LLSERG | SGLDW   | GKTD..LEELH | GCAC                  | HVARANS...DLTGLVAMFKG | ILDAEPTYDF |
| UPI0008E55EB3_3   | YVNFYAHPPFFRENGRSTR | REFFFDLL | LLSERG | SGLDW   | GKTD..LEELH | GCAC                  | HVARANS...DLTGLVAMFKG | ILDAEPTYDF |
| UPI00067BEF49_4   | YVNFYAHPPFFRENGRSTR | REFFFDLL | LLSERG | SGLDW   | GKTD..LEELH | GCAC                  | HVARANS...DLTGLVAMFKG | ILDAEPTYDF |
| UPI00057BE929_4   | YVNFYAHPPFFRENGRSTR | REFFFDLL | LLSERG | SGLDW   | GKTD..LEELH | GCAC                  | HVARANS...DLTGLVAMFKG | ILDAEPTYDF |
| A0A1Q6Y6M8_3_17   | YVNFYAHPPFFRENGRSTR | REFFFDLL | LLSERG | SGLDW   | GKTD..LEELH | GCAC                  | HVARANS...DLTGLVAMFKG | ILDAEPTYDF |
| UPI0009E5EABD_6   | YVNFYAHPPFFRENGRSTR | REFFFDLL | LLSERG | SGLDW   | GKTD..LEELH | GCAC                  | HVARANS...DLTGLVAMFKG | ILDAEPTYDF |
| A0A1V3JK40_8_19   | YVNFYAHPPFFRENGRSTR | REFFFDLL | LLSERG | SGLDW   | GKTD..LEELH | GCAC                  | HVARANS...DLTGLVAMFKG | ILDAEPTYDF |
| F9GRCS_9_187      | YVNFYAHPPFFRENGRSTR | REFFFDLL | LLSERG | SGLDW   | GKTD..LEELH | GCAC                  | HVARANS...DLTGLVAMFKG | ILDAEPTYDF |
| B0UG5_17_197      | YVNFYAHPPFFRENGRSTR | REFFFDLL | LLSERG | SGLDW   | GKTD..LEELH | GCAC                  | HVARANS...DLTGLVAMFKG | ILDAEPTYDF |
| A0A170P2H9_12_2   | YVNFYAHPPFFRENGRSTR | REFFFDLL | LLSERG | SGLDW   | GKTD..LEELH | GCAC                  | HVARANS...DLTGLVAMFKG | ILDAEPTYDF |
| UPI0002F384D1_6   | YVNFYAHPPFFRENGRSTR | REFFFDLL | LLSERG | SGLDW   | GKTD..LEELH | GCAC                  | HVARANS...DLTGLVAMFKG | ILDAEPTYDF |
| A1WDL7_3_197      | YVNFYAHPPFFRENGRSTR | REFFFDLL | LLSERG | SGLDW   | GKTD..LEELH | GCAC                  | HVARANS...DLTGLVAMFKG | ILDAEPTYDF |
| UPI00034B50C5_3   | YVNFYAHPPFFRENGRSTR | REFFFDLL | LLSERG | SGLDW   | GKTD..LEELH | GCAC                  | HVARANS...DLTGLVAMFKG | ILDAEPTYDF |
| A0A1F1R1C4_8_19   | YVNFYAHPPFFRENGRSTR | REFFFDLL | LLSERG | SGLDW   | GKTD..LEELH | GCAC                  | HVARANS...DLTGLVAMFKG | ILDAEPTYDF |
| A0A1I0DG93_11_126 | YVNFYAHPPFFRENGRSTR | REFFFDLL | LLSERG | SGLDW   | GKTD..LEELH | GCAC                  | HVARANS...DLTGLVAMFKG | ILDAEPTYDF |
| UPI000687D97E_1   | YVNFYAHPPFFRENGRSTR | REFFFDLL | LLSERG | SGLDW   | GKTD..LEELH | GCAC                  | HVARANS...DLTGLVAMFKG | ILDAEPTYDF |
| A0A1I30ZM6_6_18   | YVNFYAHPPFFRENGRSTR | REFFFDLL | LLSERG | SGLDW   | GKTD..LEELH | GCAC                  | HVARANS...DLTGLVAMFKG | ILDAEPTYDF |
| A0A1Q4D7X4_2_18   | YVNFYAHPPFFRENGRSTR | REFFFDLL | LLSERG | SGLDW   | GKTD..LEELH | GCAC                  | HVARANS...DLTGLVAMFKG | ILDAEPTYDF |
| A0A0S3A1L8_6_19   | YVNFYAHPPFFRENGRSTR | REFFFDLL | LLSERG | SGLDW   | GKTD..LEELH | GCAC                  | HVARANS...DLTGLVAMFKG | ILDAEPTYDF |
| A0A1L6KEU1_8_19   | YVNFYAHPPFFRENGRSTR | REFFFDLL | LLSERG | SGLDW   | GKTD..LEELH | GCAC                  | HVARANS...DLTGLVAMFKG | ILDAEPTYDF |
| UPI000366F73B_6   | YVNFYAHPPFFRENGRSTR | REFFFDLL | LLSERG | SGLDW   | GKTD..LEELH | GCAC                  | HVARANS...DLTGLVAMFKG | ILDAEPTYDF |
| UPI00080736C1_5   | YVNFYAHPPFFRENGRSTR | REFFFDLL | LLSERG | SGLDW   | GKTD..LEELH | GCAC                  | HVARANS...DLTGLVAMFKG | ILDAEPTYDF |
| UPI0000A3BA2FA_6  | YVNFYAHPPFFRENGRSTR | REFFFDLL | LLSERG | SGLDW   | GKTD..LEELH | GCAC                  | HVARANS...DLTGLVAMFKG | ILDAEPTYDF |
| A0A0Q0DXW8_6_19   | YVNFYAHPPFFRENGRSTR | REFFFDLL | LLSERG | SGLDW   | GKTD..LEELH | GCAC                  | HVARANS...DLTGLVAMFKG | ILDAEPTYDF |
| F3K4B7_6_192      | YVNFYAHPPFFRENGRSTR | REFFFDLL | LLSERG | SGLDW   | GKTD..LEELH | GCAC                  | HVARANS...DLTGLVAMFKG | ILDAEPTYDF |
| UPI000A1E064D_5   | YVNFYAHPPFFRENGRSTR | REFFFDLL | LLSERG | SGLDW   | GKTD..LEELH | GCAC                  | HVARANS...DLTGLVAMFKG | ILDAEPTYDF |
| UPI0009EEADE2_5   | YVNFYAHPPFFRENGRSTR | REFFFDLL | LLSERG | SGLDW   | GKTD..LEELH | GCAC                  | HVARANS...DLTGLVAMFKG | ILDAEPTYDF |
| A0A1H4G457_18_2   | YVNFYAHPPFFRENGRSTR | REFFFDLL | LLSERG | SGLDW   | GKTD..LEELH | GCAC                  | HVARANS...DLTGLVAMFKG | ILDAEPTYDF |
| UPI00040402DE_9   | YVNFYAHPPFFRENGRSTR | REFFFDLL | LLSERG | SGLDW   | GKTD..LEELH | GCAC                  | HVARANS...DLTGLVAMFKG | ILDAEPTYDF |
| UPI00069F6EC9_1   | YVNFYAHPPFFRENGRSTR | REFFFDLL | LLSERG | SGLDW   | GKTD..LEELH | GCAC                  | HVARANS...DLTGLVAMFKG | ILDAEPTYDF |
| A0A1I5Q715_9_19   | YVNFYAHPPFFRENGRSTR | REFFFDLL | LLSERG | SGLDW   | GKTD..LEELH | GCAC                  | HVARANS...DLTGLVAMFKG | ILDAEPTYDF |
| A0A0Q8QUA0_11_1   | YVNFYAHPPFFRENGRSTR | REFFFDLL | LLSERG | SGLDW   | GKTD..LEELH | GCAC                  | HVARANS...DLTGLVAMFKG | ILDAEPTYDF |
| A0A127P6W6_11_1   | YVNFYAHPPFFRENGRSTR | REFFFDLL | LLSERG | SGLDW   | GKTD..LEELH | GCAC                  | HVARANS...DLTGLVAMFKG | ILDAEPTYDF |
| A0A0J1H0J4_8_19   | YVNFYAHPPFFRENGRSTR | REFFFDLL | LLSERG | SGLDW   | GKTD..LEELH | GCAC                  | HVARANS...DLTGLVAMFKG | ILDAEPTYDF |
| A0A06RRH4_8_19    | YVNFYAHPPFFRENGRSTR | REFFFDLL | LLSERG | SGLDW   | GKTD..LEELH | GCAC                  | HVARANS...DLTGLVAMFKG | ILDAEPTYDF |
| A0A1Q9GA12_8_19   | YVNFYAHPPFFRENGRSTR | REFFFDLL | LLSERG | SGLDW   | GKTD..LEELH | GCAC                  | HVARANS...DLTGLVAMFKG | ILDAEPTYDF |
| A0A0C5WS76_9_19   | YVNFYAHPPFFRENGRSTR | REFFFDLL | LLSERG | SGLDW   | GKTD..LEELH | GCAC                  | HVARANS...DLTGLVAMFKG | ILDAEPTYDF |
| A0A1V9DP73_8_19   | YVNFYAHPPFFRENGRSTR | REFFFDLL | LLSERG | SGLDW   | GKTD..LEELH | GCAC                  | HVARANS...DLTGLVAMFKG | ILDAEPTYDF |



B

3SHG:B|PDBID|CH

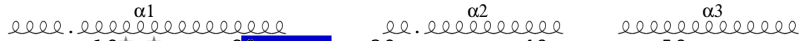

3SHG:B|PDBID|CH rv3642c MFVQATELQKV.KRRFRNVRATRRNTELEGRSTAA.TRADQNDYARGLITAAELGERVRRRYNIQ...
UPI000832D23F\_7 A.KRRVRAVRAIRRS...
UPI00082C240F\_2 TEAQKA.KRRVRAVRAIRRS...
G4I6D2\_2\_60 TEEQKT.ARRVKA...
W5TMS7\_2\_60 TEGQKV.QRRVKT...
UPI0009A5D092\_2 TEVQRV.QRRVRA...
A0A0E4AFR4\_2\_60 TELQKT.KRRVKT...
A0A1A3KDX0\_2\_60 TELKKA.KRRVKA...
A0A1E8Q071\_2\_60 TELQKA.KRRVKA...
A0A0E2WVB8\_2\_59 TELQEV.KRRVKA...
UPI00097CF213\_2 TESQKV.KRRVKA...
UPI0006422C37\_2 TELQKA.KRRVKA...
UPI0009E28ADE\_2 TEVQRS.ERRVKA...
UPI0009289DF2\_2 TEFPEQ.QRRVKA...
A0A1N0TDD8\_2\_60 TELQKQ.QRRVKA...
UPI000833536A\_2 TETETT.ERRAK...
A0A1X1R4Q5\_2\_60 TEAEQT.ERRAK...
UPI0008DD3888\_2 TEVEQT.ERRAK...
A1UQ27\_3\_59 ESEKA.KRRVKA...
UPI000943FAD8\_1 IQDS.ERRAK...
UPI0009A8218D\_2 TDRQET.VRR...
UPI00096F39BD\_2 AETQNA.QRR...
UPI0004905613\_9 ADSRVVADARRS...
A0A1V2NIC6\_8\_60 S.HDRA...
A0A0Q8VNA8\_4\_60 EITEV.ERKRA...
UPI0008B347C7\_5 SDL.ARRRDA...
A0A239J6M2\_7\_61 SDL.SRMDRA...
A0A135GY75\_8\_62 DDR.AREERA...
A0A0H5NQB0\_8\_62 DER.VRRA...
UPI00050BF362\_9 DRRVRA...
UPI00085ADBD2\_4 RRA.GDRA...
A0A0S9P2Y8\_3\_58 EREL.AGERA...
UPI000A012D50\_2 TNAEAV.AQR...
A0A110S2N0\_5\_60 SNEV.SRR...
H5TVL9\_6\_60 DEV.SRR...
UPI00093AA5CF\_4 EHREV.SRR...
UPI000A00FE44\_4 EHREV.SRR...
UPI000792E744\_5 REI.LRR...
UPI0009DB9FB2\_2 TRSAYVSSAR...
UPI0008BB363F\_1 VERQRRVDDA...
UPI0005C67994\_9 SEE.VER...
UPI0006A7995A\_8 AAEE.AQR...
A0A1H9QKA5\_5\_64 TATTATTA.AE...
E4HMx0\_5\_64 TATTATTA.AE...
UPI00042978D6\_6 AATATTA.AE...
UPI0003FE80F6\_5 TATTVTV.DER...
UPI0005BD049A\_4 TTA.AER...
UPI00048E2562\_4 TTE.AER...
A0A1Q2TPT2\_10\_6 TTE.AER...
UPI000425A80D\_1 ATSV.GER...
UPI00094464B0\_8 E.GER...
U2QDR5\_6\_66 VKTTAELIR...
A0A0Q4TFM1\_14\_6 RQSV...
UPI0008B98120\_8 ETTS.AER...
A0A0E7NX76\_4\_59 AKTR.DQ...
UPI000689D92C\_8 DMTIA.QAR...
A0A1H4NGX2\_5\_56 EVRAIQ...
S7W2K8\_4\_56 T.EVRAIQ...
B0RBR7\_10\_62 R.EER...
A0A067M114\_2\_46 EDA...
UPI000A18C66F\_1 AAER.EL...
A0A1M3M0C7\_12\_6 AAER.EL...
A0A1H3TGB6\_11\_6 ASER.EL...
UPI0008DA32F1\_1 AAER.EL...
A0A1V3BV1\_14\_6 AQR...
UPI00036400EA\_1 RR.AER...
UPI00041A9938\_1 TTE.AER...
A0A1E4CGU2\_10\_6 ADV.AAR...
UPI0009F18FB8\_1 TER...
A0A0F6WC8\_3\_57 DQ.AER...
UPI000400A3BA\_7 TAAER.AER...
UPI000648B4EF\_3 TTASVEI.TR...
UPI0008B9B90DE\_2 DER.TRR...
A0A087C752\_2\_56 DER.TRR...
UPI0008B9AFF33\_2 DER.TRR...
A0A087E0R2\_2\_55 DER.TRR...
UPI000932FDF1\_3 VDEA.RRA...
A0A133KPY8\_11\_6 DRVED...
A0A087BMT9\_5\_52 KDIALA...
A0A0A7I8V6\_4\_59 AAKA.ARN...
D4BSE5\_7\_62 KSEM.RRR...
I3B613\_7\_63 SESEM.RRR...
A0A173WTZ0\_7\_62 ESEM.RRR...
A0A1V8QR10\_2\_56 TEQ.EIR...
A0A0M4LWC4\_20\_7 DMTEQ.EIR...
UPI0008B9A2F6E\_2 TER.ESRA...
S6CE34\_2\_50 DRE...
A0A1Y4HTY9\_2\_52 DRK...
A0A1Y4AN57\_2\_51 DRK...
A0A229VUX5\_2\_52 DRK...
UPI000422B7EF\_2 DRK...
A0A0K1F2T6\_2\_50 DRK...
A0A0K1F0R0\_68\_1 DRK...
UPI0003B683F4\_2 DRE...
A0A1Y4GJM4\_13\_6 NRK...
M7MPG6\_4\_56 T.EQR...
A0A0K2GYT1\_2\_56 NTQ.QL...
M1UJ93\_3\_56 SQ.ER...
A0A134BHL8\_4\_51 TR...
D6SNL8\_4\_59 KET...
I4MFV0\_4\_59 KET...
A0A0B5DAF2\_2\_59 TRTTT.TE...

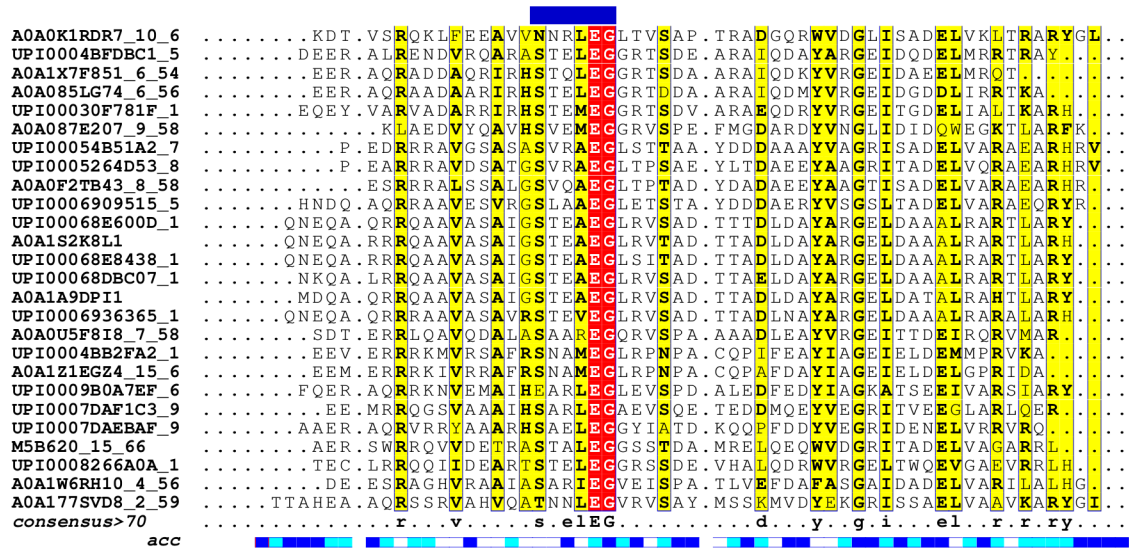

C

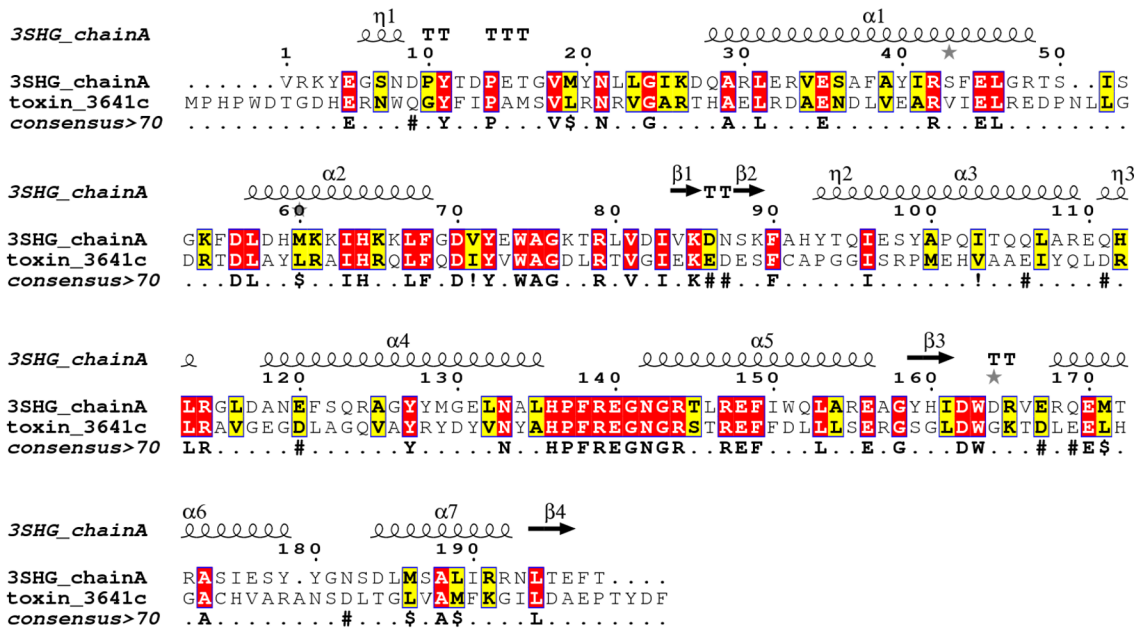

D

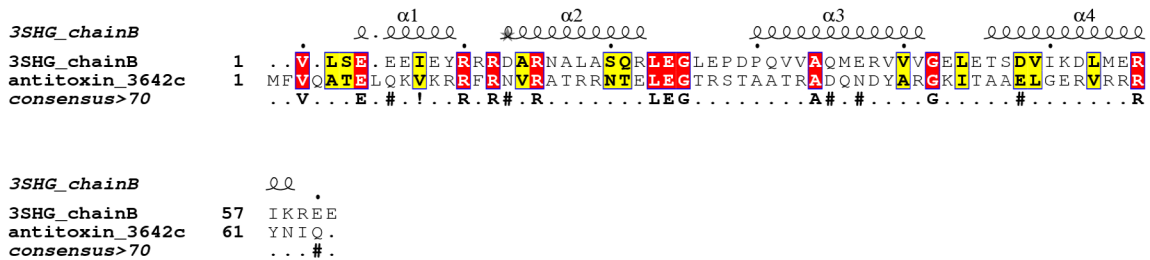

**Figure S14:** Multiple sequence alignment of VbhT sequences from PFAM (PF02661) with Rv3641c in (A) and VbhA with Rv3642c in (B) shows the conservation of signature motifs characteristic of these two proteins. VbhT (3shg) from *Bartonella Schoenbuchensis* serves as the reference structure in the alignment that was generated using Promals3D. Signature motifs in the two alignments are marked with a blue box on top of the alignment. Consensus sequence (at a threshold > 70%) is shown at the bottom of the alignment. Solvent accessibility of the reference structure, shown using the Esprout colour convention with dark blue indicating exposed residues, cyan showing partially exposed residues and white for buried residues (and red for residues for which this value could not be determined), is shown at the bottom of the alignment. In (C) and (D) are shown the alignments for the toxin (Rv3641c) and antitoxin (Rv3642c) with template 3shg. This alignment was employed to model the protein.



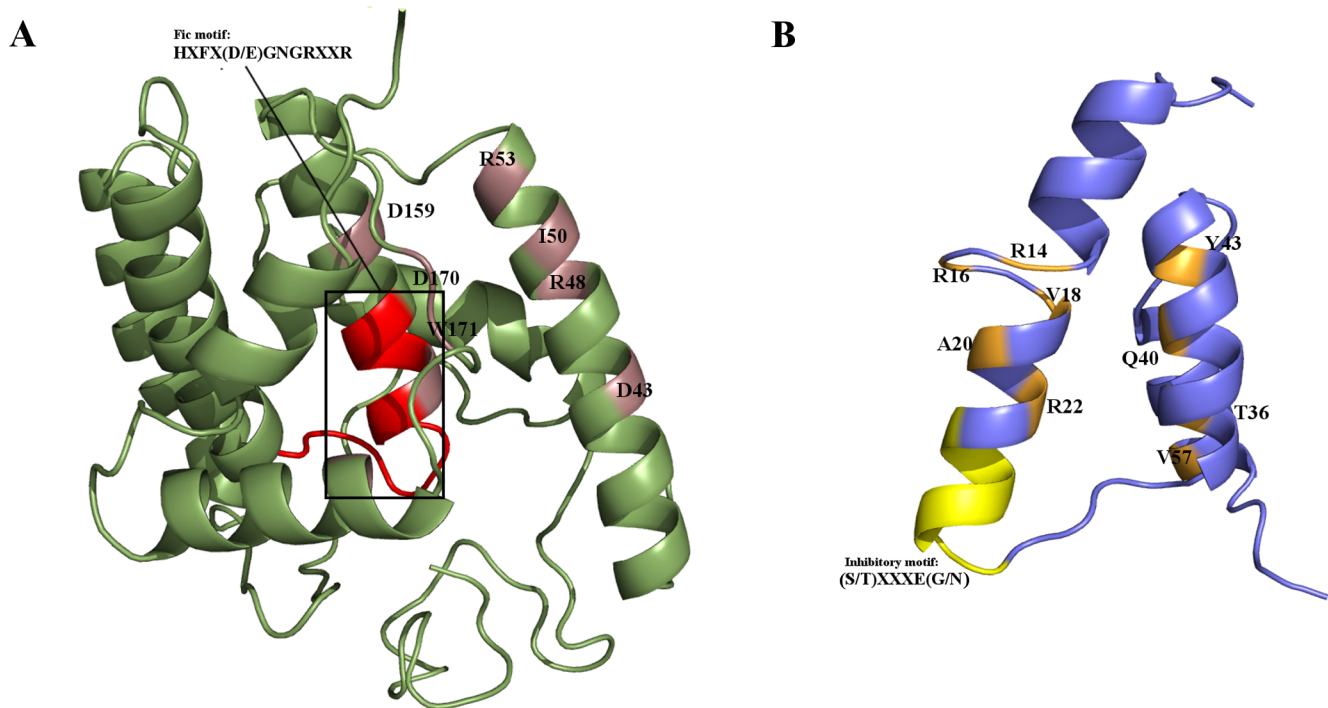

**Figure S15: Structural model of putative VbhTA in *M. tuberculosis*.** Cartoon representation of the comparative models of Rv3641c in green (**A**) and Rv3642c in blue (**B**) were derived using the template VbhTA (3shg) from *Bartonella schoenbuchensis*. Predicted Fic motif and inhibitory motif are shown in red and yellow respectively. Residues predicted to form the interaction interface between Rv3641c-Rv3642c are shown and colored in pink on the toxin and orange on the antitoxin.
